1 **Identification of New *In Vivo* TonB-FepA Rendezvous Sites**

2

3

4

5 **Kathleen Postle<sup>1,2\*</sup>, Kelvin Kho<sup>1,3</sup>, Michael Gresock<sup>1,4</sup>, Joydeep Ghosh<sup>2,5</sup>, and**  
6 **Ray Larsen<sup>2,6</sup>**

7

8 **Running title: *In vivo* TonB-FepA interactions**

9

10 **Keywords: TonB, FepA, disulfide bond, amphipathic helix, energy**  
11 **transduction**

12

13 **Department of Biochemistry and Molecular Biology, The Pennsylvania State**  
14 **University, University Park, PA, 16802, USA**

15 **\* Correspondence: <sup>1</sup>Kathleen Postle, Department of Biochemistry and**  
16 **Molecular Biology, The Pennsylvania State University, University Park, PA**  
17 **16802, USA. e-mail: [postle@psu.edu](mailto:postle@psu.edu), Ph. 1-814-863-7568, Fx. 1-814-863-7024**

18

19 **<sup>2</sup>School of Molecular Biosciences, Washington State University, Pullman, WA**

20 **99163**

21 **Current addresses:**

22 **<sup>3</sup>Institut Pasteur, Unité Biologie et Génétique de la Paroi Bactérienne,**

23 **Département de Microbiologie, Paris 75015, France**

24 **<sup>4</sup>Department of Biology, University of Mt. Union, Alliance OH, 44601**

25 **<sup>5</sup>Division of Cellular and Gene Therapies, US FDA Center for Biologics**

26 **Evaluation and Research, Silver Spring, MD**

27 **<sup>5</sup>Department of Biological Sciences, Bowling Green State University, Bowling**

28 **Green OH, 43403**

29

30

31

## 32 ABSTRACT

33 The TonB system of Gram-negative bacteria uses the protonmotive force of the  
34 cytoplasmic membrane to energize active transport of large or scarce nutrients  
35 across the outer membrane by means of customized beta-barrels known as TonB-  
36 dependent transporters (TBDTs). The lumen of each TBDT is occluded by an  
37 amino-terminal domain, called the cork, which must be displaced for transport of  
38 nutrients or translocation of the large protein toxins that parasitize the system. A  
39 complex of cytoplasmic membrane proteins consisting of TonB, ExbB and ExbD  
40 harnesses the protonmotive force that TonB transmits to the TBDT. The specifics  
41 of this energy transformation are a source of continuing interest. The amino  
42 terminal domain of a TBDT contains a region called the TonB box, that is essential  
43 for the reception of energy from TonB. This domain is the only identified site of *in*  
44 *vivo* interaction between the TBDT and TonB, occurring through a non-essential  
45 region centered on TonB residue Q160. Because TonB binds to TBDTs whether or  
46 not it is active or even intact, the mechanism and extent of cork movement *in vivo*  
47 has been challenging to discover. In this study, we used *in vivo* disulfide  
48 crosslinking between eight engineered Cys residues in *Escherichia coli* TonB and  
49 42 Cys substitutions in the TBDT FepA, including the TonB box, to identify novel  
50 sites of interaction *in vivo*. The TonB Cys substitutions in the core of an essential  
51 carboxy terminal amphipathic helix (residues 199-216) were compared to TonB

52 Q160C interactions. Functionality of the *in vivo* interactions was established when  
53 the presence of the inactive TonB H20A mutation inhibited them. A previously  
54 unknown functional interaction between the hydrophilic face of the amphipathic  
55 helix and the FepA TonB box was identified. Interaction of Q160C with the FepA  
56 TonB box appeared to be less functionally important. The two different parts of  
57 TonB also differed in their interactions with the FepA cork and barrel turns. While  
58 the TonB amphipathic helix Cys residues interacted only with Cys residues on the  
59 periplasmic face of the FepA cork, TonB Q160C interacted with buried Cys  
60 substitutions within the FepA cork, the first such interactions seen with any TBDT.  
61 Both sets of interactions required active TonB. Taken together, these data suggest a  
62 model where the amphipathic helix binds to the TonB box, causing the  
63 mechanically weak domain of the FepA cork to dip sufficiently into the  
64 periplasmic space for interaction with the TonB Q160 region, which is an  
65 interaction that does not occur if the TonB box is deleted. The TonB amphipathic  
66 helix also interacted with periplasmic turns between FepA  $\beta$ -strands *in vivo*  
67 supporting a surveillance mechanism where TonB searched for TBDTs on the  
68 periplasmic face of the outer membrane.

69



## 70 INTRODUCTION

71 The TonB system of *Escherichia coli* appears to be an answer to the challenges  
72 posed to Gram-negative bacteria by their dual membrane cell envelope. In  
73 particular, the outer membrane is a largely protective sieve with a diffusion cut-off  
74 of around 600 Da in *E. coli* (1). To capture large, scarce, essential nutrients, the  
75 outer membrane displays high-affinity customized  $\beta$ -barrels for active transport of  
76 diverse ligands (2). The energy for the active transport across the essentially  
77 unenergized outer membrane comes from a complex of cytoplasmic membrane  
78 proteins, TonB, ExbB, and ExbD. This complex harvests the cytoplasmic  
79 membrane proton gradient and transforms it into mechanical energy which drives  
80 vectorial transport of ligands through TBDTs and into the periplasmic space (3)  
81 (Fig. 1). Because these transporters bind directly only to TonB and not ExbB or  
82 ExbD during the energy transduction, they have been termed TonB-dependent  
83 transporters (TBDTs) (4). There is some confusion in the historical literature  
84 whereby they were first called TonB-dependent receptors because they were  
85 initially identified as receptors for colicins and bacteriophages, now known to be  
86 opportunistic agents (5-7). They have also been called TonB-gated transporters,  
87 TGTs, (8) and ligand-gated porins, LGPs, (9). *Escherichia coli* K12 encodes nine  
88 different TBDTs mostly devoted to acquisition of iron by various means with one  
89 devoted to cobalamin transport. While *E. coli* has dedicated TBDTs for a variety

90 of siderophores, enterochelin (a.k.a. enterobactin) is the single iron-chelating  
91 siderophore that *E. coli* synthesizes and excretes to capture iron from its  
92 environment [for a review see (10)]. The TBDT that provides for the recovery of  
93 iron-bearing enterochelin is FepA.

94 Each TBDT consists of a 22-stranded  $\beta$ -barrel, the lumen of which is  
95 occluded by an essential internal globular domain of  $\sim 150$  residues called the cork  
96 (or hatch) [(11); for a review see (2)]. Because they are similar in structure, the  
97 results from one TBDT largely apply to most TBDTs. The mechanism by which  
98 TBDTs actively transport ligands such as the iron-siderophore enterochelin or  
99 cobalamin across the outer membrane remains a mystery, but there is general  
100 agreement that the cork must somehow move.

101 A TBDT cork has both a mechanically weak (approximately residues 1-70)  
102 and mechanically recalcitrant domain (approximately residues 70-150) both *in vivo*  
103 and *in vitro* (9, 12-14). An essential motif of five to seven mostly conserved  
104 residues known as the TonB box occupies the amino terminus of the mechanically  
105 weak domain. The TonB boxes of TBDTs are interchangeable, indicating that they  
106 do not mediate ligand specificity (15, 16).

107 The precise energy-transducing interaction of TonB with TBDTs has been  
108 challenging to define by structural determinations *in vitro* because ExbB and ExbD

109 functions, and the protonmotive force of the cytoplasmic membrane are all  
110 required for TonB-dependent energy transduction. Furthermore, *in vitro* and *in*  
111 *vivo* TonB binds to TBDTs regardless of its ability to transduce energy, (17-22),  
112 suggesting that certain residue-specific interactions result in energy transduction  
113 while other interactions fail to accomplish it.

114         The TonB protein is anchored in the cytoplasmic membrane by its  
115 hydrophobic amino terminal signal anchor with the rest of the protein (residues 33-  
116 239) occupying the periplasmic space [(23), Fig.1]. Interestingly, there are no  
117 essential residues in TonB (17, 24-28). In fact, even the His20 residue in the  
118 transmembrane domain can be replaced with non-protonatable Asn and retain full  
119 function, suggesting that the H20A mutation used in that study renders TonB  
120 inactive through steric distortion of its transmembrane domain in complex with  
121 ExbB and ExbD transmembrane domains (28).

122         There are, however, seven residues in the periplasmic TonB carboxy  
123 terminus (out of 90 sequentially scanned) that are functionally important (Y163,  
124 F180, G186, F202, W213, Y215, and F230) (27). With the exception of G186,  
125 these residues represent the complete set of aromatic residues in the last 90  
126 residues of the carboxy terminus from 150-239, with the only other aromatic  
127 residue in the entire periplasmic domain (residues 33-239) being F125. We think  
128 these seven residues are the key because:

129           1) When substituted with Ala or Cys, each of these residues exhibits an  
130 idiosyncratic phenotype, with the profile of activities in four different assays being  
131 distinct for each of the seven substitutions (27, 29). They appear to be the means  
132 by which TonB discriminates among different TBDTs or possibly the colicins that  
133 parasitize them (30). In contrast, Cys substitution at the only other aromatic  
134 residue, TonB F125C, supports wild-type activity.

135           2) They are synergistic with one another such that any combination of two  
136 mutations (2 Ala, 2 Cys, or a combination) is completely inactive in all assays in a  
137 double mutant cycle analysis. For example, TonB F202A, W213A used in previous  
138 studies is completely inactive, whereas TonB F125A is not synergistic with  
139 substitutions at any of the seven residues (17, 27, 29). It therefore seems to set a  
140 maximal boundary on the active domain of the TonB carboxy terminus from G186  
141 to F230, which contains a single amphipathic helix (residues 199-216).

142           3) Cys substitutions in five out of the seven important carboxy terminal  
143 residues (G186C, F202C, W213C, Y215C, F230C) are the only ones out of the 90  
144 Cys substitutions that form disulfide-linked triplet homodimers (17, 27). While  
145 both inactive and active TonB binds to transporters, the disulfide-linked  
146 homodimers formed through the five Cys substitutions are trapped in  
147 configurations such that they no longer fractionate significantly with the outer  
148 membrane (17, 27). In contrast, TonB F125C, which appears to be outside the

149 active domain of the carboxy terminus, forms triplet homodimers that, like wild-  
150 type TonB, still fractionate ~ 40% with the outer membrane, indicating that the  
151 subsequent, more carboxy-terminal residues, including especially the amphipathic  
152 helix, are free to undergo necessary conformational changes (31).

153 TonB is the limiting protein in the TonB system (32) and different TBDTs  
154 must compete for its attention (33). TonB therefore interacts transiently with  
155 ligand-loaded TBDTs in *E. coli* K12, giving rise to an energy transduction cycle  
156 (67). Over the years we have defined stages in that cycle *in vivo*, the model for  
157 which is depicted in Fig. 2.

158 In the model, the TonB carboxy termini of homodimers are conformationally  
159 dynamic while the amino termini remain stably homodimerized throughout the  
160 energy transduction cycle (31). Protonmotive force of the cytoplasmic membrane  
161 is transduced into active transport at the outer membrane through sequential  
162 contacts by the TonB carboxy terminus, first with itself, then with the ExbD  
163 carboxy terminus, then with a TBDT (31). *In vivo* interaction sites between TonB  
164 homodimers and between TonB-ExbD heterodimers have been identified, and a  
165 common region between them is the TonB amphipathic helix (residues 199-216;  
166 Fig. 3) (27, 34, 35). The primary goal of this study was to determine if the TonB  
167 amphipathic helix played a role in contact with FepA.

168           Here we explored TonB interactions with three different regions of FepA—  
169 the TonB box, the cork, and the  $\beta$ -strand turns of the barrel. A novel *in vivo*  
170 interaction between Cys substitutions in the hydrophilic face of the essential TonB  
171 amphipathic helix and Cys substitutions in the essential FepA TonB box was  
172 identified. Interactions between TonB amphipathic helix and  $\beta$ -strand turns of the  
173 FepA barrel were identified, providing the first *in vivo* support for a surveillance  
174 model where TonB searches for a TBDT. The difference in interaction profiles  
175 with the mechanically weak domain of the FepA cork between the TonB  
176 amphipathic helix and TonB Q160 led to a model where the amphipathic helix  
177 pulls the mechanically weak domain of the FepA cork out of the barrel sufficiently  
178 that TonB Q160 interacts with otherwise buried residues.

179

180

181

182 **RESULTS**

183

184 *The carboxy terminal TonB amphipathic helix is essential for TonB system*  
185 *activity.*

186

187 The TonB region from ~ R158-N162, centered on TonB Q160 interacts with  
188 the TonB boxes of TBDTs *in vivo* [Fig. 4A; (4, 36)]. While the TonB box as a  
189 whole is essential for TBDT activity, its precise amino acid composition is tolerant  
190 of substitutions except for structure-breaking residues such as L8P in BtuB or I14P  
191 in FepA, substitutions that result in inactivation of the TBDT (4, 15, 36, 37). Even  
192 then, the TonB Q160 region still interacts with the BtuB L8P mutant TonB box *in*  
193 *vivo*, but in a different way (4).

194 Based on the position of residue Q160 within the TonB carboxy terminus,  
195 the solved crystal structures of TBDTs, and the solved crystal structures of TonB  
196 carboxy termini in complex with those TBDTs (Fig. 4B), it seems unlikely that  
197 Q160 contacts a TBDT without significant conformational changes to make the  
198 TonB box more accessible. The deletion of the proline rich domain that accounts  
199 for ~ 100 Å of TonB's reach to a TBDT has negligible effect upon its activity  
200 unless the periplasmic space is artificially expanded by transient exposure to high  
201 salt (24, 38, 39). This observation suggests that residues nearer the carboxy

202 terminus of TonB could be more important. There is also evidence that unknown  
203 regions in addition to the FepA TonB box and TonB Q160 are involved in  
204 transport (12, 40). Furthermore, the TonB Q160 region is not essential, suggesting  
205 that its role in contacting a TBDT is not essential (11).

206         The periplasmic TonB carboxy terminus contains an amphipathic helix  
207 (residues 199-216) which has been intriguing for many years (24, 29, 41). It  
208 includes three of the seven functional carboxy terminal residues, F202, W213 and  
209 Y215. To further explore the role the amphipathic helix plays in the mechanism of  
210 TonB-dependent energy transduction, we deleted the amphipathic helix codons  
211 199-216 from plasmid pKP325, resulting in plasmid-encoded TonB $\Delta$ AH (Fig. 5A).  
212 Plasmids expressing chromosomal levels of TonB $\Delta$ AH (pKP476) were unable to  
213 complement KP1477 ( $\Delta$ tonB) in cross-streaks against colicins B, Ia, and M, the  
214 most sensitive assays known for TonB function, requiring ~1 active TonB  
215 molecule per cell (42).

216         TonB $\Delta$ AH fractionated on sucrose density gradients with ~ 60% located in the  
217 cytoplasmic membrane fractions and ~40% with the outer membrane fractions  
218 (Fig. 6A), the same proportions with which wild-type TonB fractionates (43). It is  
219 not known what causes TonB to bind sufficiently tightly to outer membrane  
220 components that ~ 40 % is pulled out of its complex with cytoplasmic membrane  
221 proteins ExbB and ExbD to fractionate with the outer membrane. One hypothesis



222 is that TonB outer membrane fractionation reflects a transient tight association  
223 with outer membrane molecules--likely TBDTs--during Stage IV in the energy  
224 transduction cycle (Fig. 2). While the region required for outer membrane  
225 fractionation, residues 175-239, includes the amphipathic helix (43) and is  
226 responsible for the ability of TonB to formaldehyde crosslink to FepA (37), this  
227 result indicated that the amphipathic helix was not the region responsible for  
228 fractionation of TonB with the outer membrane.

229         The inactivity of TonB $_{\Delta AH}$  could have been due to structural perturbation.  
230 Alternatively, it could have been due to the simultaneous deletion of residues  
231 F202, W213, and Y215, since combination of two Ala substitutions at any of those  
232 residues renders TonB inactive (27, 29). Individual Cys substitutions from E203  
233 through R212 have little phenotypic effect (27). To retain F202, W213, and Y215  
234 and broadly restore the overall structure, we shifted the 10-amino acid core region  
235 within the helix out of frame starting at residue 203 and shifted it back into frame  
236 at residue 213 (TonB $_{fs}$ , pKP372). The result for TonB $_{fs}$  was that the predicted  
237 helical region was shortened slightly to encompass residues 201-209 (as analyzed  
238 by JPRED), lost much of its amphipathic character, and at residue 210, Met was  
239 substituted with Cys due to the frameshift (Fig. 5). Like TonB $_{\Delta AH}$ , TonB $_{fs}$  was  
240 completely insensitive in the colicin assays.

241           Due to the newly created M210C, TonB<sub>fs</sub> efficiently formed triplet  
242 homodimers. Like those of the Cys substitutions in functionally important  
243 residues, the TonB<sub>fs</sub> triplet homodimers fractionated essentially entirely with the  
244 cytoplasmic membrane, suggesting that they had trapped TonB at a stage in the  
245 energy transduction cycle before TonB associates with the outer membrane [Fig.  
246 6B; (17, 27)]. TonB M210C in the context of otherwise wild-type residues is  
247 active and does not form triplet homodimers (27).

248           The *in vivo* dynamics of the TonB carboxy terminus suggest that it achieves  
249 a monomeric conformation at some point in the energy transduction cycle to allow  
250 productive interaction with FepA (31). Because a detectable proportion of TonB<sub>fs</sub>  
251 remained monomeric and was also found in the outer membrane on longer  
252 exposures (data not shown), its inactivity was not due to 100% entrapment as a  
253 triplet homodimer (Fig. 5B). We concluded that one or more aspects of the core  
254 amphipathic helix domain were required for TonB activity.

255

256   ***The TonB amphipathic helix interacts functionally with the FepA TonB box.***

257

258           An analysis of whether and how the TonB amphipathic helix interacts *in*  
259 *vivo* with any of the TBDTs has never been performed. To investigate interactions  
260 between the TonB amphipathic helix and the FepA TonB box, we used *in vivo*

261 disulfide crosslinking of TonB and FepA Cys substitutions expressed at  
262 chromosomal levels, followed by electrophoresis on non-reducing SDS gels and  
263 immunoblotting with anti-TonB monoclonal antibodies.

264 We surveyed crosslinking by TonB amphipathic helix residues R204C,  
265 V206C, N208C, A209C, and R212C (Fig. 5). When expressed at chromosomal  
266 levels, each of the TonB Cys substitutions was at least 60% active in <sup>55</sup>Fe-  
267 ferrichrome transport assays (Table 1). TonB Q160C, over 100% active and a  
268 known site of interaction with other TBDT TonB boxes, was also tested for  
269 comparison to the amphipathic helix Cys substitutions [Table 1; (4, 16)]. The  
270 FepA TonB box Cys substitutions tested were D12C, T13C, I14C, V15C, V16C  
271 and T17C; FepA T13C is fully active (44) as was FepA V16C (Table 1) with the  
272 rest assumed to be active.

273 The amphipathic helix substitutions at R204C, N208C and R212C formed  
274 disulfide-linked complexes with all FepA TonB box Cys residues except N208C  
275 with FepA T17C (for unknown reasons) (Fig. 7A). In contrast, TonB V206C and  
276 A209C did not form significant complexes with any of the FepA TonB box Cys  
277 residues, thus constituting a non-reactive hydrophobic face of the amphipathic  
278 helix. Steady state levels of monomeric TonB from samples in Fig. 7A are  
279 presented in Fig. 7B.

280 To determine if the TonB-FepA disulfide crosslinks were biologically  
281 relevant, each TonB Cys substitution was also paired with the H20A mutation in  
282 the TonB transmembrane domain (44). This mutation inhibits homodimerization of  
283 TonB through its carboxy terminus, a step necessary for formation of carboxy  
284 terminal TonB-ExbD heterodimers and the subsequent correct interaction of the  
285 TonB carboxy terminus with FepA [Figs. 2 and 4A, (18, 31)]. TonB H20A  
286 epitomizes the behavior of inactive TonB because it still interacts at unknown sites  
287 with FepA *in vivo* (17, 18). The TonB H20A mutation rendered all the TonB Cys  
288 substitutions inactive (Table 1).

289 The H20A mutation essentially eliminated complex formation by R204C,  
290 N208C and R212C, indicating that the H20 wild-type versions were engaging in  
291 biologically relevant interactions. The possibility that H20A somehow promoted  
292 new interactions with the hydrophobic face (substitutions V206C and A209C) was  
293 excluded since no complexes were observed. These results indicated that the TonB  
294 amphipathic helix contacted the essential FepA TonB box *in vivo*, consistent with  
295 its role in TBDT reception of TonB-transmitted energy. The TonB amphipathic  
296 helix is the first known alternative to the TonB Q160 region for contact with the  
297 FepA TonB box.

298 In the solved co-crystal structures of the TonB carboxy terminus with the  
299 TBDTs BtuB and FhuA, TonB residues R204, N208 and R212 of the amphipathic

300 helix interact with the barrels, but not the TonB boxes [Fig. 8, (20, 45)]. The lack  
301 of interaction with the TonB amphipathic helix in those elegant co-crystal  
302 structures supports the idea that the TonB carboxy terminus remains able to bind to  
303 TBDTs and other proteins in an “un-energized” conformation (17, 18, 46, 47).

304

305 ***TonB Q160 interaction with the FepA TonB box is only partially dependent on***  
306 ***TonB activity.***

307

308 Although the interaction of the TonB Q160 region with the TonB boxes of  
309 several TBDTs has been well-documented both *in vivo* and *in vitro* (4, 15, 16, 48-  
310 51), there has not yet been an analysis of how TonB Q160 interacts with the TonB  
311 box of FepA nor an analysis of effects of inactive TonB upon any TBDT TonB box  
312 interaction. In Fig. 7A, TonB Q160C crosslinked with all of the FepA TonB box  
313 Cys substitutions, consistent with its behavior seen previously for BtuB Cys  
314 substitutions in the TonB box (4). FepA V16C was chosen as the standard in all  
315 subsequent experiments because it exhibited the highest degree of disulfide  
316 crosslinking to TonB Q160C (Fig. 7A, left panel, lane 3), allowing comparisons of  
317 relative levels of TonB-FepA complex formation.

318           The H20A mutation detectably decreased TonB Q160C crosslinking, but  
319 without obliterating it altogether, suggesting that it represented a partially  
320 functional interaction (Fig. 7A, left panel, compare lanes 3 and 4).

321           All of the interactions gave rise to an apparent higher and an apparent lower  
322 mass complex within an approximate mass of one TonB plus one FepA (~ 116  
323 kDa). [Although it has a calculated molecular mass of 26 kDa, TonB has an  
324 apparent mass of 36 kDa on SDS gels because 17% of its residues are prolines  
325 (41)]. Each of the two forms likely represented two different conformations made  
326 by the same complex. First, because only a single unoxidized Cys exists in FepA  
327 [because its two native Cys residues C487 and C494 are always oxidized (52)] and  
328 in the TonB Cys substitutions studied here, all of which carry the C18G  
329 substitution that removes the single native Cys. Second because the complexes are  
330 also detected with anti-FepA polyclonal antibodies, ruling out participation of a  
331 different protein (data not shown). And third, because similar doublets are also  
332 seen with TonB-BtuB disulfide-linked complexes *in vivo* (4). That disulfide-linked  
333 complexes can have different apparent masses depending on conformations of the  
334 participants is exemplified by the three different disulfide-linked TonB  
335 homodimers that result from a single TonB Cys substitution and demonstrably  
336 occur on non-reducing SDS polyacrylamide gels (17).

337

338 ***Other FepA Cys substitutions assessed include the cork and periplasmic turns***  
339 ***between  $\beta$ -strands of the barrel.***

340

341 Interaction of the TonB Cys substitutions with several additional FepA Cys  
342 substitutions other than the TonB box was assayed to identify potential additional  
343 sites of interaction by both the TonB amphipathic helix and Q160. In the  
344 mechanically weak domain of the FepA cork, L23, S29, T32, A33, D34, and E35  
345 are periplasmically accessible in the crystal structure. Residues A42, S46, and G54  
346 are buried; T51 is partially buried. L85 is in the mechanically recalcitrant domain  
347 and is partially buried [Fig. 9]. FepA residue T32, semi-conserved across TBDTs  
348 (53), and the less-well-conserved A33 were included because they bind to TonB at  
349 unknown sites and respond differentially to the presence and absence of ligand in  
350 FepA photocrosslinking studies *in vivo* (40). G54 exhibits a modest change in  
351 periplasmic exposure upon ligand binding (9).

352 FepA residues in the mechanically recalcitrant segment of the FepA cork  
353 (V91, S92, S112, E120, V124, A131, V142, I145) were also evaluated to detect  
354 possible cork movements not observed previously [(12) Fig. 10]. Also evaluated  
355 were FepA R75, R126, E511, and E567, which form part of the “lock region”, with  
356 R75 and R126 in the recalcitrant domain of the FepA cork, and E511 and E567  
357 positioned in the barrel (12, 14, 54). The lock region is proposed to be important

358 for transport but not binding of ligand, with the positively and negatively charged  
359 residues forming a structure that keeps the cork bound to the barrel [(36, 55, 56).

360 Contact with residues in periplasmic turns between  $\beta$ -strands of the FepA  
361 barrel, including the cork and barrel linker (D185, P243, D298, D356, D422,  
362 D455, D519, E576, D618, and D664; Fig. 11) were assessed, something that has  
363 not been investigated before for any TBDT. FepA residue E152, which marks the  
364 transition from cork to barrel and residue T722, the third residue from the carboxy  
365 terminus of FepA, were also included in the analysis.

366 Overall, 35 additional Cys substitutions in FepA were tested for their ability  
367 to form disulfide crosslinks with TonB Cys substitutions.

368

369 ***TonB amphipathic helix interactions extend into the mechanically weak region***  
370 ***of the FepA cork.***

371

372 To define the boundaries of reactive residues in the TonB amphipathic helix,  
373 the set of core TonB amphipathic helix Cys substitutions was expanded to include  
374 M201C and R214C (Fig. 5). Each TonB Cys substitution was assayed pairwise at  
375 least twice in combination with the 35 additional FepA Cys substitutions outside  
376 the TonB box.



377 Together, these results indicate that only Cys residues in the mechanically  
378 weak region of the FepA cork interacted with TonB Cys substitutions, whereas  
379 mechanically recalcitrant cork region (substitutions R75C through I145C) and the  
380 two lock region residues in the barrel, E511C and E567C were essentially non-  
381 reactive (Fig. 12A, B). Several interactions also occurred with FepA periplasmic  
382  $\beta$ -strand turns (Fig. 12C). All interactions involved the same reactive face of the  
383 amphipathic helix that interacted with the TonB box: R204C, N208C, and R212C.  
384 TonB M201C and R214C gave little to no interaction with any FepA Cys,  
385 confirming the boundaries of the core reactive residues. A key observation for a  
386 model to be described in the discussion was that none of the core amphipathic  
387 helix Cys residues (R204C, N208C, and R212C) interacted detectably with FepA  
388 Cys substitutions that were buried in the crystal structure (A42C, S46C, T51C, and  
389 G54C) (Figs. 9, 12A).

390 TonB R204C made several H<sub>2</sub>O-dependent contacts with most of the  
391 periplasmically-accessible FepA cork Cys residues (L23C, S29C, T32C, A33C,  
392 and D34C, but not E35C), with S29C and A33C interactions being the most  
393 abundant (Fig. 13A).

394 The only residue in the cork region significantly contacted by TonB N208C  
395 was FepA S29C and it was an H<sub>2</sub>O-dependent interaction (Fig. 14A).

396 TonB R212C made the highest degree of H2O-dependent contacts with FepA  
397 S29C—as high as the contacts between TonB Q160C and the FepA TonB box  
398 residue V16C, which were the highest we observed (Figs. 7, 14B).

399 FepA S29C appeared to be a hot spot since R204C, N208C, and R212C as  
400 well as the boundary-defining TonB M201C and R214C made complexes with it.  
401 FepA S29 is located close to the center of the first  $\beta$ -strand of the cork. It is within  
402 the region through which TonB could mechanically pull to unravel the cork as  
403 suggested before for FhuA (20), possibly as the site of *in vivo* TonB interaction at  
404 the as-yet-to-be-identified non-TonB box site prior to TonB box exposure (12).

405

406 ***The TonB amphipathic helix interacts with periplasmic FepA  $\beta$ -strand barrel***  
407 ***turns.***

408

409 *In vivo*, TonB interacts with FepA at one or more sites before it interacts  
410 with the FepA TonB box (12). Instead of FepA S29, the periplasmic  $\beta$ -strand turns  
411 of TBBDTs could constitute such sites.

412 The last 150 residues of the TonB periplasmic domain, within which the  
413 amphipathic helix resides, have a calculated pI of 10.4 (41). It seemed logical that  
414 this TonB domain would be most likely to interact with the negatively charged  
415 residues of FepA barrel turns, where there appears to be one in nearly every turn

416 (except Pro243 in turn 2), including Glu152 in the linker region between cork and  
417  $\beta$ -strand 1. Such interactions would likely be mediated through additional  
418 residues of TonB and FepA that would bring the now Cys-substituted residues into  
419 proximity (Fig. 11).

420 All of the FepA Cys substitutions in  $\beta$ -strand turns exhibited the ability to  
421 support fully wild-type levels of  $^{55}\text{Fe}$ -enterochelin transport except FepA E152C  
422 and T722C, where the levels dropped to  $\sim 60\%$  (Table 1). Two Cys substitutions  
423 in the lock region of the barrel, E511C and E567C, were also assayed. FepA  
424 E511C had little effect on FepA activity, and E567C reduced activity to 65% of  
425 wild-type. Cys substitutions in the cork components of the lock region, R75C and  
426 R126C, reduced transport to  $\sim 40\%$  of wild-type levels but did not eliminate it.  
427 Thus, neither the charged residues in the periplasmic  $\beta$ -strand turns nor the lock  
428 region residues were individually essential for FepA function.

429 Several sites of interaction between the TonB amphipathic helix residues  
430 R204C, N208C, and R212C and the periplasmic FepA  $\beta$ -strand barrel turns are  
431 summarized in Fig. 12C.

432 For TonB R204C, two different forms of the complex were observed, as was  
433 also seen with the FepA cork Cys substitutions (Fig. 13B). In contrast to  
434 interactions with the FepA cork, the apparent masses of the complexes with  
435 E152C, P243C, D298C, and D422C shifted to significantly higher values, highest

436 in the case of the latter three for unknown reasons. In contrast to interactions with  
437 the cork, the  $\beta$ -strand barrel complexes were largely insensitive to the presence of  
438 TonB H20A. Overall intensities of the complexes remained similar with both  
439 TonB H20 and TonB H20A versions of R204C, but in the case of TonB H20A, the  
440 complexes appeared to slightly shift their abundance to the higher mass complex—  
441 again for unknown reasons.

442 For TonB N208C, weak interactions were detected with FepA E152C,  
443 P243C, D298C, and D519C, each of which was H20-dependent (Fig. 14A). In  
444 addition, TonB N208C made a very high level of contacts with D422C whether  
445 TonB H20 or H20A was present. TonB R212C made a moderately high level of  
446 H20-sensitive contacts with P243C, D422C, and D519C, whereas the contact with  
447 D455C was largely H20-insensitive (Fig. 14B). Thus, both functional and non-  
448 functional TonB amphipathic helix contacts occurred with the FepA  $\beta$ -strand turns.

449

450 ***TonB Q160 interactions include buried cork residues.***

451

452 Previous studies of TonB Q160C with TBDTs have been confined to the  
453 TonB box. Since the TonB amphipathic helix made FepA contacts outside the  
454 TonB box, we wanted to explore the possibility that Q160 did so as well.

455 Surprisingly, TonB Q160C interacted more widely than the amphipathic  
456 helix did with Cys substitutions throughout the mechanistically weak part of the  
457 FepA cork (Figs. 15A, B). Disulfide-linked heterodimers were observed between  
458 TonB Q160C and FepA V16C, L23C, S29C, T32, A33C, D34C, E35C, A42C,  
459 S46C and T51C, with the highest degree of interactions occurring with D34C and  
460 S42C. The presence of the H20A mutation greatly diminished, and in most cases  
461 eliminated, the crosslinking detected, suggesting that when TonB was inactive, the  
462 ability of Q160C to make contacts within the mechanically weak domain of the  
463 FepA cork was entirely prevented, unlike the interaction with the FepA TonB box  
464 (Fig. 7A; 15C)

465 The disulfide crosslinking between TonB Q160C and FepA A42C or S46C  
466 was notable because A42 and S46 are buried in the FepA crystal structure. TonB  
467 Q160C crosslinks with FepA A42C were as abundant as those between the  
468 standard TonB Q160C-FepAV16C pair (Figs. 9 and 15C). FepA A42 and S46 are  
469 positioned in a plane approximately mid-way between top and bottom of the cork.  
470 FepA A42 is on the interface with the FepA barrel. FepA S46 is entirely buried  
471 within the cork (Fig. 9). These key observations are incorporated into a model in  
472 the discussion.

473 TonB Q160C did not interact abundantly with any Cys substitutions more  
474 carboxy-terminal than FepA T51C (Fig. 12). Consistent with cork movement,

475 weak H<sub>2</sub>O-specific interactions with FepA G54C were also observed on long  
476 exposures (Fig. 16, lane 5). Ma et al. previously observed modest periplasmic  
477 exposure of FepA G54C in the presence of enterochelin (9). With the exception of  
478 scarcely detectable interactions with D519C in a barrel turn, no interactions of  
479 TonB Q160C with any of the remaining FepA Cys substitutions from V91C  
480 through I145C (the mechanically recalcitrant domain), the lock region or the barrel  
481 turns were detected no matter how long the exposures were (Figs. 12B and 12C;  
482 data not shown). These observations form an important part of the model  
483 presented in the discussion.

484

485 ***Deletion of the FepA TonB box prevents Q160C FepA cork interactions.***

486

487 Prior to the experiments above, the interaction of TonB Q160 with TBDT  
488 sites other than their TonB boxes had not been tested. Since several additional  
489 interactions were identified, we attempted to determine an order of events by  
490 analyzing the effect of a FepA TonB box deletion on complex formation with the  
491 FepA Cys substitution D34C with which TonB Q160C interacts with as abundantly  
492 as it does the FepA TonB box, and G54C, which is buried and where the  
493 interaction is weaker. In both cases, deletion of the FepA TonB box (residues 12-  
494 17) essentially prevented the interaction (Fig. 16A, lanes 4 and 6). This finding

495 suggested that prior contact by unspecified TonB residues with the FepA TonB  
496 box was required for TonB Q160C to interact with FepA cork residues beyond the  
497 TonB box.

498

499 ***TonB F202A, W213A lacks ExbD contact and inhibits the interaction of TonB***  
500 ***Q160C with the FepA TonB box.***

501

502 In TonB, the F202A and W213A mutations boundary the core of the  
503 amphipathic helix and, in combination, completely inactivate it (29). TonB F202A,  
504 W213A was used as a tool to better understand parameters of the interaction  
505 between TonB Q160C and FepA V16C in the TonB box.

506 At the time when we discovered the inactivity of TonB F202A, W213A, the  
507 TonB-ExbD interaction captured by *in vivo* formaldehyde crosslinking of TonB  
508 had yet to be identified, however we knew that such double Ala mutations in the  
509 carboxy terminus did not prevent formation of the disulfide-linked TonB triplet  
510 homodimers (17, 29). In this study, the effect of the F202A, W213A mutation as  
511 well as another double Ala mutation--F202A, Y215A--was to prevent formation of  
512 the Stage III TonB-ExbD formaldehyde crosslinked heterodimer (18, 31). It was  
513 particularly telling that even when the TonB double Ala mutants were  
514 overexpressed, there was still no formation of the TonB-ExbD heterodimer, which

515 appears to play a key role in configuring TonB for successful energy transduction  
516 to FepA (Fig. 17; Fig. 2, Stage III TonB-ExbD heterodimers).

517         When F202 and W213 are mutated individually, they support intermediate  
518 and assay-specific levels of TonB activity (29). Consistent with that, the TonB  
519 Q160C, F202A substitution was still able to form the Q160C-V16C complex (Fig.  
520 lane 4). Although the presence of the F202A, W213A double mutations rendered  
521 TonB proteolytically unstable (Fig. 18, lane 5), as seen previously (29), it was  
522 possible to increase the exposure time of the immunoblot to the point where the  
523 level of monomer (Fig. 18, lane 6) was slightly greater than the level seen for the  
524 TonB Q160C and its F202A derivative (Fig. 18, lanes 3 and 4). In the longer  
525 exposure, it was clear that the ability of the TonB Q160C, F202A, W213A to form  
526 complexes with FepA V16C was significantly diverted away from the FepA TonB.  
527 Instead, the absence of a functional TonB carboxy terminus led Q160C to form  
528 three complexes, too small to be complexes with FepA. The location and spacing  
529 of the complexes were reminiscent of disulfide-linked TonB triplet homodimers  
530 that represent three different conformations of the TonB carboxy terminus *in vivo*  
531 (17).

532

## 533 **DISCUSSION**

534



535           While TonB remains anchored in the cytoplasmic membrane by its amino  
536 terminal transmembrane domain, the periplasmically localized TonB carboxy  
537 terminus binds transiently and cyclically to TonB-dependent transporters (TBDTs)  
538 in the outer membranes of Gram-negative bacteria to transduce cytoplasmic  
539 membrane protonmotive force energy required for the active transport of ligands  
540 (8). The *in vivo* molecular mechanism is not well understood. Previously, the only  
541 known *in vivo* interaction between TonB and TBDTs involved the region of TonB  
542 Q160 and the BtuB and FecA TonB boxes (4, 16, 50). Because our earlier studies  
543 had suggested additional but unknown sites are involved *in vivo*, we searched for  
544 site-specific interactions between TonB and FepA, the TBDT that transports the  
545 sole siderophore synthesized and secreted by *E. coli* (12). TonB sites focused on  
546 TonB Q160 and the TonB carboxy terminal amphipathic helix and their potential  
547 interactions with sites in the FepA TonB box, in both mechanically weak and  
548 mechanically recalcitrant domains of the FepA cork, and in FepA  $\beta$ -strand barrel  
549 turns. It is important to study TonB interactions with TBDTs in their native  
550 environment, where ExbB, ExbD and the protonmotive force of the cytoplasmic  
551 membrane are all present (57).

552

553 ***The TonB carboxy terminal amphipathic helix is essential for the energy***  
554 ***transduction cycle.***

555

556           TonB encoded from an amber mutation at codon 175 is inactive,  
557 demonstrating that, although TonB Q160 has been the only site established to  
558 interact with TBDTs, it is not sufficient for activity, and indicating that some  
559 aspect of the last 65 TonB residues is essential (37). Within those last 65 residues,  
560 we focused on the role of a sole amphipathic helix in the TonB carboxy terminus  
561 (residues 199-216).

562           We found that the TonB amphipathic helix was essential either by deleting it  
563 or by frameshifting it to maintain overall residue continuity. While this confirmed  
564 the importance of the region, those results could also reflect an inability to form  
565 TonB-TonB homodimers or TonB-ExbD heterodimers, both of which are  
566 important for the energy transduction cycle (27, 31, 34, 35). We therefore asked if  
567 the TonB amphipathic helix interacted directly with the only known essential  
568 region of the TBDT, FepA, its TonB box.

569           Based on the *in vivo* disulfide crosslinking experiments, amphipathic helix  
570 residues R204C, N208C and R212C defined a hydrophilic face that interacted with  
571 Cys substitutions throughout the FepA TonB box, whereas the two residues on the  
572 hydrophobic face, V206C and A209C did not interact with FepA. TonB R204C  
573 was previously shown to be solvent exposed at some point in the energy  
574 transduction cycle, consistent with localization on the hydrophilic face (58).

575 Because these *in vivo* interactions were prevented by the presence of the  
576 inactivating TonB H20A mutation, they comprised a set of novel, functional, and  
577 specific interactions that have been identified between TonB and a TBDT for the  
578 first time.

579 The amphipathic helix interaction with the TonB box is absent from solved  
580 co-crystal structures of the TonB carboxy terminus (~ residues 152-235) with  
581 TBDTs BtuB and FhuA. The sidechains of the hydrophilic face residues R204C,  
582 N208C, and R212C are oriented towards the TBDTs and distant from the TonB  
583 boxes in both structures (20, 45), demonstrating either the difference between *in*  
584 *vivo* “energized” and inactive TonB, or differences between TBDTs.

585 Now that an essential TonB component has been identified that interacts  
586 with an essential FepA component (TonB box), it is tempting to speculate that the  
587 TonB amphipathic helix holds the entire key to the TonB energy transduction cycle  
588 for *E. coli*. As a result of this study and previous work, residues within the TonB  
589 amphipathic helix have now been recognized to participate in sequential  
590 interactions with three different proteins—TonB with itself, with ExbD and, here,  
591 with FepA [(24, 59); Fig.2]. The amphipathic helix sequences are 55% conserved  
592 (72% if E/D, R/K, and W/F substitutions are considered equivalent) amongst  
593 enteric bacteria, but barely conserved with *Pseudomonas putida tonB*, which does  
594 not complement an *E. coli tonB* mutation (24, 59).

595 Like wild-type TonB, TonB H20A formaldehyde-crosslinks with FepA *in*  
596 *vivo*, but does not transmit energy to it (18, 28, 44). Formation of disulfide  
597 crosslinks and their elimination by the inclusion of the TonB H20A mutation was a  
598 clear indication that they represented functional interactions. While the lack of  
599 disulfide-linked complexes for some pairs likely represented lack of interactions, it  
600 could also be that the interactions could not be trapped due to due to misorientation  
601 of the thiol side chains or because the interactions were too transient. It is also  
602 likely that other important *in vivo* regions of interactions remain to be discovered.

603

604 ***A model: does the FepA cork “fish” for the TonB Q160 region?***

605

606 On the face of it, the amphipathic helix region (residues 199-216) of TonB is  
607 more logical than TonB Q160 as a site of initial contact with a TBDT TonB box  
608 because it is theoretically somewhat closer to the outer membrane. This is  
609 especially so since  $\sim 100$  Å of TonB's reach across the periplasmic space is due to  
610 the proline-rich domain (residues 70-102), which can be deleted without  
611 eliminating TonB activity [Fig. 4; (24, 39)]. In addition, the amphipathic helix is  
612 essential, whereas TonB Q160 and the region encompassing it (residues R158-  
613 Q162) can be deleted without inactivating TonB (26). Why this region has been a

614 source of second site suppressors for inactive TBDT TonB box mutations remains  
615 a mystery (48, 49).

616 Because it is not essential, the wide range of *in vivo* contacts made by TonB  
617 Q160C was surprising, encompassing not only the FepA TonB box seen previously  
618 for other *E. coli* TBDTs but also, for the first time, residues throughout the region  
619 of the mechanically weak domain of the FepA cork. Most importantly, two of the  
620 interacting residues (A42, and S46) are buried within in the FepA cork (60). In  
621 contrast to the partially H<sub>2</sub>O-sensitive Q160C interactions with the FepA TonB box,  
622 both of these contacts were completely prevented if the TonB Q160C also carried  
623 the inactivating H20A mutation, indicating that they fully represented the action of  
624 functional TonB. The FepA region of TonB Q160C interaction ended just prior to  
625 the beginning of the mechanically recalcitrant domain of the FepA cork.

626 TonB Q160C interacted as abundantly with FepA A42C as it did with the  
627 FepA V16C standard within the TonB box, which was the most abundant  
628 interaction seen in this entire study. Because FepA A42C is buried, this strongly  
629 suggested that enough of the cork domain entered the periplasm to expose A42C,  
630 along with S46C, to interaction with TonB Q160C. Our previous discovery of 20-  
631 to-25-fold increases in periplasmic accessibility of the buried cork residues A42C,  
632 S46C (and the partially buried T51C) in response to the addition of colicin B  
633 ligand *in vivo* validates the finding here that at some point in the energy

634 transduction cycle, these residues become available for interaction with TonB  
635 Q160C and likely neighboring residues (4, 12). In striking contrast, none of the  
636 amphipathic helix Cys substitutions interacted with FepA Cys substitutions that  
637 were buried within the cork, with targets limited to periplasmically accessible Cys  
638 residues.

639         The overall non-reactivity of the mechanically recalcitrant domain of FepA  
640 in this *in vivo* study also validated our earlier finding of its resistance to being  
641 periplasmically labeled in the presence of a large (~55 kDa) ligand, colicin B. In  
642 that study, two distinct possibilities were proposed for the mechanically  
643 recalcitrant domain: first that it did not move and second that it moved but was  
644 blocked from being labeled by the presence of another protein (12). Our studies  
645 here did not exclude either possibility. For the first possibility to be true, colicin B  
646 would need to denature on its way through a small opening, which, given its size  
647 and structure as a dumbbell that fills the FepA lumen, seems unlikely (61).  
648 Nonetheless, such denaturation has been observed for the amino-terminal domain  
649 of colicin pyoS2 of *P. aeruginosa* through its TBDT FpvA *in vivo* (62).  
650 Furthermore, the significantly smaller (~29 kDa) colicin M, which parasitizes the  
651 TBDT FhuA, uses a chaperone to fold it in the periplasm where it inhibits  
652 peptidoglycan formation (63). A mechanically recalcitrant domain for the TBDT  
653 BtuB has been characterized *in vitro* (14).

654           While it is not possible to definitively turn static data into a dynamic model,  
655 these results suggested a possible sequence of events where the TonB amphipathic  
656 helix binds to the FepA TonB box, which moves the FepA cork sufficiently that its  
657 mechanically weak domain extends into the periplasm. Previously buried cork  
658 residues are thus able to “fish” for interactions with various sites on TonB, among  
659 which we captured the TonBQ160C interaction. It is notable that the hydrophilic  
660 face of the amphipathic helix contacted multiple residues in the  $\beta$ -strand turns of  
661 the FepA barrel, whereas TonBQ160C could contact none of them, consistent with  
662 the idea that it does not reach that far across the periplasmic space. These results  
663 may also explain why the Q160 region of TonB is not essential—it is secondary  
664 and incidental to the action of the TonB amphipathic helix at the FepA TonB box.

665           Consistent with this model, without the FepA TonB box present for the  
666 amphipathic helix to engage, TonB Q160C did not interact at either a residue  
667 central to the mechanically weak FepA domain (D34C) or a residue at its near  
668 boundary with the mechanically recalcitrant FepA domain (G54C).

669           The combination of F202A, W213A mutations on either side of the TonB  
670 amphipathic helix substantially inhibited the normal interaction of TonB Q160C  
671 with FepA TonB box residue V16C. As such, the double TonB mutation  
672 somewhat mimicked the effect of the FepA TonB box deletion that prevented  
673 Q160C interactions with FepA D34C and G54C, suggesting that TonB F202A,

674 W213A might have inhibited the amphipathic helix from engaging the FepA TonB  
675 box, preventing the FepA cork from fishing for TonB Q160C.

676 Consistent with our results revealing movement of the FepA cork, Majumdar  
677 et al. engineered intra-cork disulfide bonds in FepA, most of which significantly  
678 decreased Fe-enterochelin transport. The transport was restored in the presence of  
679 reducing agent, indicating that there are required conformational changes within  
680 the cork itself (52).

681

### 682 ***Comparison to results from in vivo photocrosslinking to study FepA dynamics***

683

684 We previously identified FepA residues that interact with TonB using *in vivo*  
685 photocrosslinking by the reagent pBpa inserted at sites of engineered amber  
686 substitutions in *fepA* (40). A potential conformational switch signaling to TonB  
687 that ligand (enterochelin) is bound was identified. FepA T32pBpa bound TonB in  
688 the absence enterochelin whereas FepA A33pBpa bound TonB in its presence. In  
689 the current study, both FepA T32C and A33C interactions occurred with both  
690 TonB R204C in the amphipathic helix and Q160C without discrimination, perhaps  
691 reflecting an average of ligand-bound and unbound states for FepA. FepA  
692 S29pBpa, A42CpBpa, S46pBpa, and T51pBpa in the mechanically weak domain  
693 did not significantly photocrosslink to TonB, even though these variants all



694 supported ~ 75% activity. This could be because the interactions are too rapid to  
695 capture, whereas in the current study, the disulfide bond formations would  
696 potentially have been aided by the DsbA system (64).

697         Although the effect of a *dsbA* mutation on disulfide formation in this study  
698 was not tested, the effect on TonB triplet homodimer formation are informative  
699 and suggest that the frustrating answer is: it depends. Plasmids expressing TonB  
700 F125C, G186C, F202C, W213C, Y215C, or F230C substitutions were transformed  
701 into an isogenic *dsbA* strain, KP1514 [W3110,  $\Delta(\textit{tonB}, P14::\textit{blaM}), \textit{dsbA}::\textit{kan}$ ],  
702 and the degree of disulfide-linked triplet homodimer formation was compared to  
703 previous results from a *dsbA*<sup>+</sup> strain (27). TonB F125C, TonB Y215C and TonB  
704 F230C showed greatly diminished triplet dimer formation in the absence of DsbA,  
705 with an intermediate decrease for W213C. In no case was triplet dimer formation  
706 entirely abolished. For TonB F202C and TonB G186C, there was no effect of the  
707 *dsbA* mutation (Spicer and Postle, unpublished data).

708         In contrast to the present study, FepA E120pBpa and I145pBpa on the  
709 periplasmic face of the FepA cork, did photocrosslink to TonB (40). We do not  
710 have an explanation for these differences but note that the techniques are  
711 dissimilar, and the disulfide crosslinking studies here were congruent with our  
712 studies of *in vivo* FepA cork accessibility (12).

713

714 ***Current in vivo approaches are not amenable to discovery of TonB aromatic***  
715 ***residue contacts with FepA.***

716

717 This study revealed the importance of the TonB amphipathic helix core  
718 (residues 204-212) in contacting the TonB box of FepA. However, individual Cys  
719 substitutions within that core have no phenotype (27). Similarly, the sequences of  
720 TBDT TonB boxes contain little residue-specific information and indeed can be  
721 swapped for one another (15, 16). It is therefore unlikely that this set of  
722 interactions is responsible for the idiosyncratic phenotypes observed for Cys and  
723 Ala substitutions of the aromatic residues that boundary the amphipathic helix  
724 core—F202 and W213 among others.

725 We have been, unfortunately, thwarted in our ability to define the sites on  
726 FepA where TonB F202 and W213 interact due to two factors, both based on  
727 signal-to-noise ratios. First, Cys substitutions at these aromatic residues form a  
728 sufficiently high abundance of disulfide-linked triplet homodimers *in vivo* that any  
729 side reactions would be swamped out and difficult to interpret (17, 27). Second,  
730 there appears to be a region of TonB that cannot be analyzed by *in vivo*  
731 photocrosslinking. We previously used targeted amber mutations in *fepA* and in  
732 *exbD* to guide insertion of the photocrosslinkable amino acid pBpa and generate  
733 crosslinks at unknown sites in TonB *in vivo*. In those studies, both the *fepA* and

734 *exbD* amber mutations fully incorporate the pBpa and result in full-length proteins  
735 (40, 65).

736 We were hopeful that a reciprocal approach using targeted amber mutations  
737 in *tonB* at the carboxy terminal aromatic residues would be fruitful, however, we  
738 were thwarted by failure to incorporate sufficient pBpa, except small amounts and  
739 only after highest overexpression, such that ~ 85-100% of the TonB was present as  
740 the truncated amber mutant form or its degradation product. Given the dominant  
741 negative gene dosage effect of *tonB* overexpression, the high level of incomplete  
742 TonB fragments would have obscured meaningful interpretations (3, 66). There  
743 may be something unusual about this particular region of *tonB* during translation  
744 since we have been able to successfully incorporate pBpa into *tonB* at engineered  
745 amber sites in the transmembrane domain (Postle and Guzek, unpublished data).

746

#### 747 *Surveillance of FepA periplasmic $\beta$ -strand turns*

748

749 TonB binds to transporters whether or not it is “energized”, although it is  
750 still not clear what that term means mechanistically. For example, inactive TonB  
751 H20A formaldehyde-crosslinks to FepA *in vivo* (18) and purified inactive carboxy  
752 terminal domains of TonB bind with varying affinities to purified transporters *in*  
753 *vitro* (19, 21, 22). Here we identified the first *in vivo* interactions between the

754 TonB amphipathic helix and the FepA  $\beta$ -strand turns, the majority of which  
755 appeared to represent interactions with inactive TonB.

756 The periplasmic  $\beta$ -strand turns are candidates for one or more TonB-FepA  
757 binding sites since they protrude more deeply into the periplasm than the face of  
758 the cork does (Fig. 11). We chose Cys substitutions at Asp or Glu residues (and  
759 Pro243) in the periplasmic  $\beta$ -strand turns as most likely to be required for FepA  
760 activity and were surprised they were all functional. The fact that they had little to  
761 no effect on activity, builds on and confirms a tolerance to mutation that generally  
762 characterizes TBDTs (36, 40), where only certain structurally disruptive mutations  
763 such as a Leu-to-Pro mutation in the TonB box, its complete deletion, or Arg-to-  
764 Pro in the lock region residue 75 lead to TBDT inactivation (4, 15, 55).

765 Interaction of TonB N208C with the FepA periplasmic  $\beta$ -strand turn 5  
766 D422C variant was striking for two reasons: first, because it was so abundant--as  
767 abundant as the control TonB Q160C-FepA V16C interaction, and second because  
768 it was impervious to the presence of the inactivating TonB H20A substitution. In  
769 contrast, TonB R212C formed complexes with Cys residues in several  $\beta$ -strand  
770 turns, the majority of which decreased if TonB was inactivated by the H20A  
771 mutation.

772 Phage panning using a purified TonB carboxy terminus identifies TonB  
773 interaction sites on FhuA sites corresponding to barrel turns 1 and 2, represented in

774 this study by FepA D185C and P243C (56). We did not observe interaction of  
775 TonB with D185, but we did observe R204C, N208C and R212C interacting with  
776 P243C; interactions by N208C and R212C were both H<sub>2</sub>O-dependent.

777         Considering all the results, this study demonstrated that the hydrophilic face  
778 of the essential TonB amphipathic helix was used for contacts throughout FepA. It  
779 also validated the idea that, *in vivo*, there are certain TonB-FepA contacts made by  
780 active TonB, with a different set of contacts that do not lead to energy transduction  
781 events. The contacts made by inactive “unenergized” TonB, some of which were  
782 quite abundant, could be consistent with membrane surveillance and  
783 conformational sampling (27, 46) where TonB discriminates between a TBDT and  
784 a porin, or searches for a ligand-loaded TBDT (67). Because the ligand  
785 enterochelin was present throughout the experiments here, it will be important to  
786 determine which TonB-FepA interaction sites are ligand-dependent. If any *in vivo*  
787 TonB-FepA interactions are H<sub>2</sub>O-dependent as well as ligand-dependent, they  
788 would constitute candidates important for energy transduction.

789

790

## 791 **METHODS AND MATERIALS**

792

### 793 ***Bacterial strains & plasmids***

794         The strains and plasmids used in this study are listed in Table 2. All bacteria  
795 are derivatives of *Escherichia coli* K-12 strain W3110. KP1491 was constructed  
796 by P1<sub>vir</sub> transduction of the  $\Delta(\text{tonB}, P14)::\text{blaM}$  cassette from KP1477 into  
797 KP1489 (W3110  $\Delta\text{fepA}$ ).

798         Plasmids pKP1858 and pKP1859 were created from pKP476 and pKP372  
799 respectively, using polymerase chain reaction (PCR)-based site-directed  
800 mutagenesis as previously described (26) to create C18G substitutions in both  
801 plasmids. The majority of plasmids encoding *tonB* mutants were derived from  
802 pKP1362 (*tonB* C18G), which was constructed by cloning *tonB* C18G from  
803 pKP568 into the SphI site of pPro33, allowing for expression from the propionate  
804 promoter (68). Plasmids encoding *fepA* mutants were derived from pKP515 where  
805 *fepA* is expressed from the arabinose promoter in pBAD24 (11). Mutations were  
806 engineered through PCR-based site-directed mutagenesis as previously described  
807 (26). The coding region of each engineered mutant gene was confirmed through  
808 Sanger sequencing at the Pennsylvania State University Nucleic Acid Facility.

809

### 810 ***Growth media and culture conditions***

811 Liquid cultures were grown at 37°C with aeration in LB broth or in M9  
812 minimal salts supplemented with 1% glycerol, 0.2% vitamin-free casamino acids,  
813 40 µg ml<sup>-1</sup> of tryptophan, 4 µg ml<sup>-1</sup> of thiamine, 1 mM MgSO<sub>4</sub> and 0.5 mM CaCl<sub>2</sub>.  
814 For disulfide-crosslinking, the M9 minimal salts medium was further  
815 supplemented with 10 µM Fe (as ferric chloride). For [<sup>55</sup>Fe]-enterochelin transport  
816 assays, the M9 minimal salts medium was supplemented with 1.85 µM Fe (as  
817 ferric chloride) as well as 40 µg ml<sup>-1</sup> of tyrosine and 40 µg ml<sup>-1</sup> of phenylalanine to  
818 facilitate growth of *aroB* strains on which they were performed (69).  
819 Chloramphenicol at 34 µg ml<sup>-1</sup> and ampicillin at 100 µg ml<sup>-1</sup> were used to maintain  
820 TonB and FepA plasmids respectively. The TonB plasmids were induced with the  
821 following concentrations with sodium propionate to achieve chromosomal levels;  
822 TonB C18G (10 mM), TonB C18G M201C (10 mM), TonB C18G R204C (0.5  
823 mM), TonB C18G V206C (10 mM), TonB C18G N208C (10 mM), TonB C18G  
824 A209C (10 mM), TonB C18G R212C (1 mM), TonB C18G R214C (10 mM), all  
825 TonB C18G H20A cysteine substitutions (15 mM). FepA cysteine substitutions  
826 were not induced as the base expression level approximated chromosomally  
827 encoded FepA levels in cells grown with 1.85 µM Fe.

828

829 ***Sucrose density gradient fractionations***

830 Sucrose density gradient fractionation was carried out essentially as  
831 described previously (43) with some modifications. Strain KP1344 containing  
832 plasmids pKP1858 or pKP1859 was grown as described above, in the presence of  
833 0.002% arabinose and 0.1% arabinose respectively, to mid exponential phase.  
834 Cells were harvested and lysed by French pressure cell at 4° C. The cell lysate  
835 supernatant was applied to the top of the sucrose gradient and centrifuged in a  
836 Beckman SW40 rotor at 35,000 r.p.m. for 19 hours at 4° C. Collected fractions  
837 were precipitated with an equivalent volume of 20% trichloroacetic acid (TCA) at  
838 4° C, and suspended in Laemmli sample buffer (70) (LSB) at 95°C for 5 minutes.  
839 10 µl of each sample was electrophoresed on 12% SDS-polyacrylamide gels and  
840 then immunoblotted with TonB 4F1 monoclonal antibodies (71).

841

#### 842 ***In vivo formaldehyde crosslinking***

843 Strains were subcultured 1:100 from saturated LB cultures into  
844 supplemented M9 minimal salts medium supplemented with L-arabinose as  
845 described in the Figure 17 legend and 34 µg ml<sup>-1</sup> chloramphenicol without added  
846 iron. Cells were harvested at an A<sub>550</sub> of 0.5 in 1 ml aliquots, centrifuged and  
847 aspirated. The pellet was suspended in 938 µl of 100 mM sodium phosphate buffer  
848 at pH 6.8 to which 62.5 µl of 16% formaldehyde was added and incubated for 15  
849 minutes at 22°C. Cells were then pelleted, suspended in 50 µl of 2x LSB (twice the



850 usual concentration) and heated for 5 minutes at 60°C. The samples were  
851 electrophoresed on 11% SDS-polyacrylamide gels and then immunoblotted with  
852 TonB 4F1 monoclonal antibodies or anti-ExbD polyclonal antibodies (32, 71).

853

### 854 ***In vivo disulfide crosslinking***

855 KP1491 harboring pairwise combinations of plasmid-encoded TonB and  
856 plasmid encoded FepA were subcultured 1:100 from saturated LB cultures into  
857 supplemented M9 minimal salts medium and grown with appropriate antibiotics to  
858  $A_{550} = 0.45$ .  $0.4 \text{ OD ml}^{-1}$  of cells were harvested by centrifugation and precipitated  
859 with an equal volume of 4°C 20% TCA to stop the proteolysis of TonB that occurs  
860 in LSB at 95°C when TCA is not used (72). The TCA-precipitated pellets were  
861 boiled at 95°C for 10 minutes in 100  $\mu\text{l}$  of LSB with 50 mM iodoacetamide to  
862 block any remaining free cysteines to prevent *in vitro* disulfide crosslinking. All  
863 samples were analyzed on 9% SDS-PAGE gels and followed by immunoblot  
864 analysis with TonB 4F1 monoclonal antibody and FepA polyclonal antibodies  
865 (32).

866 To eliminate the possibility that disulfide crosslinks formed due to the  
867 presence of TCA during cell harvesting, the efficiency of crosslinking was  
868 compared with and without TCA precipitation. Upon harvesting cells were  
869 pelleted without TCA. The cell pellets were boiled at 95°C for 10 minutes in 100

870  $\mu$ l of LSB with 50 mM iodoacetamide. TCA slightly enhanced the recovery of both  
871 crosslinked complexes, which also still formed in the absence of TCA and the  
872 monomer such that levels of crosslinking were proportional to the controls with  
873 and without TCA (data not shown).

874

### 875 [<sup>55</sup>Fe]-enterochelin transport

876 TonB and FepA with individual Cys substitutions were assessed for their  
877 initial rates of enterochelin (Sigma-Aldrich) transport as described previously (40).  
878 FepA constructs were assayed in KP1490 (W3110 *aroB*  $\Delta$ *fepA*) whereas TonB  
879 constructs were assayed in strain KP1406 (W3110 *aroB*  $\Delta$ (*tonB*, *P14*)::*blaM*).  
880 Enterochelin is the sole siderophore synthesized and secreted by *E. coli* K12. The  
881 *aroB* mutation prevents enterochelin synthesis and the synthesis of any  
882 intermediates that could interfere in the assay (69).

883

884

### 885 ACKNOWLEDGEMENTS

886

887 We thank Ryan Guzek for analysis of the TonB pBpa substitutions and  
888 construction of pKP1836 and pKP1837; Bradley Spicer for construction of  
889 pKP1382, pKP1400, pKP1403, pKP1427, FepA Cys substitutions in the TonB

890 box, and analyzing effects of a *dsbA* strain on TonB triplet homodimer formation;  
891 Suzanne Wardell for construction of pKP372; Shaima El Mowafi for construction  
892 of pKP1369 and pKP1370; Siti Kamarudin for construction of pKP1858,  
893 pKP1859, and pKP1861; Surendran Devanathan for construction of KP1491;  
894 Cheryl Swayne for construction of pKP1362; Raka Ghosh for construction of  
895 pKP1581; Yu-An Liu for construction of pKP1361; Larissa Goldman for  
896 construction of pKP1506; Gui Teng Chua for construction of pKP1841, pKP1850,  
897 and pKP1854; Elizabeth McFadden for the formaldehyde crosslinking experiment  
898 on the TonB double Ala variants, and Glenn Hwang for construction of pKP2299,  
899 pKP2303, pKP2304, the analysis of amphipathic helix Cys substitutions  
900 interactions with the FepA TonB box and excellent technical assistance. We thank  
901 the *E. coli* Genetic Stock Center and the Jonathan Beckwith lab for their *dsbA::kan*  
902 strain, RI90. Support from NIGMS grant GM112710 is gratefully acknowledged.  
903

904 **REFERENCES**

905

906 1. **Nikaido H.** 2003. Molecular basis of bacterial outer membrane permeability  
907 revisited. *Microbiol Mol Biol Rev* **67**:593-656.

908 2. **Noinaj N, Guillier M, Barnard TJ, Buchanan SK.** 2010. TonB-dependent  
909 transporters: regulation, structure, and function. *Annu Rev Microbiol* **64**:43-60.

910 3. **Fischer E, Günter K, Braun V.** 1989. Involvement of ExbB and TonB in  
911 transport across the outer membrane of *Escherichia coli*: phenotypic  
912 complementation of *exb* mutants by overexpressed *tonB* and physical stabilization  
913 of TonB by ExbB. *J. Bacteriol.* **171**:5127-5134.

914 4. **Cadieux N, Kadner RJ.** 1999. Site-directed disulfide bonding reveals an  
915 interaction site between energy-coupling protein TonB and BtuB, the outer  
916 membrane cobalamin transporter. *Proc. Natl. Acad. Sci. USA* **96**:10673-10678.

917 5. **Davies JK, Reeves P.** 1975. Genetics of resistance to colicins in  
918 *Escherichia coli* K-12: cross-resistance among colicins of group B. *J. Bacteriol.*  
919 **123**:96-101.

920 6. **Pugsley AP, Reeves P.** 1976. Increased production of the outer membrane  
921 receptors for colicins B, D and M by *Escherichia coli* under iron starvation.  
922 *Biochem. Biophys. Res. Commun.* **70**:846-853.

- 923 7. **Frost GE, Rosenberg H.** 1975. Relationship between the *tonB* locus and  
924 iron transport in *Escherichia coli*. J. Bacteriol **124**:704-712.
- 925 8. **Gresock MG, Savenkova MI, Larsen RA, Ollis AA, Postle K.** 2011.  
926 Death of the TonB shuttle hypothesis. Front. Microbiol. **2**:206.
- 927 9. **Ma L, Kaserer W, Annamalai R, Scott DC, Jin B, Jiang X, Xiao Q,**  
928 **Maymani H, Massis LM, Ferreira LC, Newton SM, Klebba PE.** 2007.  
929 Evidence of ball-and-chain transport of ferric enterobactin through FepA. J. Biol.  
930 Chem. **282**:397-406.
- 931 10. **Klebba PE, Newton SMC, Six DA, Kumar A, Yang T, Nairn BL,**  
932 **Munger C, Chakravorty S.** 2021. Iron acquisition systems of Gram-negative  
933 bacterial pathogens define TonB-dependent pathways to novel antibiotics. Chem.  
934 Rev. **121**:5193-5239.
- 935 11. **Vakharia HL, Postle K.** 2002. FepA with globular domain deletions lacks  
936 activity. J. Bacteriol. **184**:5508-5512.
- 937 12. **Devanathan S, Postle K.** 2007. Studies on colicin B translocation: FepA is  
938 gated by TonB. Mol. Microbiol. **65**:441-453.
- 939 13. **Udho E, Jakes KS, Finkelstein A.** 2012. TonB-dependent transporter FhuA  
940 in planar lipid bilayers: partial exit of its plug from the barrel. Biochemistry  
941 **51**:6753-6759.

- 942 14. **Hickman SJ, Cooper REM, Bellucci L, Paci E, Brockwell DJ.** 2017.  
943 Gating of TonB-dependent transporters by substrate-specific forced remodelling.  
944 Nat. Commun. **8**:14804.
- 945 15. **Gudmundsdottir A, Bell PE, Lundrigan MD, Bradbeer C, Kadner RJ.**  
946 1989. Point mutations in a conserved region (TonB Box) of the *Escherichia coli*  
947 outer membrane BtuB protein affect vitamin B12 transport. J. Bacteriol. **171**:6526-  
948 6533.
- 949 16. **Ogierman M, Braun V.** 2003. Interactions between the outer membrane  
950 ferric citrate transporter FecA and TonB: studies of the FecA TonB box. J.  
951 Bacteriol. **185**:1870-1885.
- 952 17. **Ghosh J, Postle K.** 2005. Disulphide trapping of an *in vivo* energy-  
953 dependent conformation of *Escherichia coli* TonB protein. Mol. Microbiol.  
954 **55**:276-288.
- 955 18. **Ollis AA, Manning M, Held KG, Postle K.** 2009. Cytoplasmic membrane  
956 protonmotive force energizes periplasmic interactions between ExbD and TonB.  
957 Mol. Microbiol. **73**:466-481.
- 958 19. **Koedding J, Howard SP, Kaufman L, Polzer P, Lustig A, Welte W.**  
959 2004. Dimerization of TonB is not essential for its binding to the outer membrane  
960 siderophore receptor FhuA of *E. coli*. J. Biol. Chem. **279**:9978-9986.

- 961 20. **Pawelek PD, Croteau N, Ng-Thow-Hing C, Khursigara CM, Moiseeva**  
962 **N, Allaire M, Coulton JW.** 2006. Structure of TonB in complex with FhuA, *E.*  
963 *coli* outer membrane receptor. *Science* **312**:1399-1402.
- 964 21. **Khursigara CM, De Crescenzo G, Pawelek PD, Coulton JW.** 2004.  
965 Enhanced binding of TonB to a ligand-loaded outer membrane receptor. Role of  
966 the oligomeric state of TonB in formation of a functional FhuA-TonB complex. *J.*  
967 *Biol. Chem.* **279**:7405-7412.
- 968 22. **Freed DM, Lukasik SM, Sikora A, Mokdad A, Cafiso DS.** 2013.  
969 Monomeric TonB and the Ton Box are required for the formation of a high-affinity  
970 transporter-TonB complex. *Biochemistry* **52**:2638-2648.
- 971 23. **Postle K, Skare JT.** 1988. *Escherichia coli* TonB protein is exported from  
972 the cytoplasm without proteolytic cleavage of its amino terminus. *J. Biol. Chem.*  
973 **263**:11000-11007.
- 974 24. **Larsen RA, Wood GE, Postle K.** 1993. The conserved proline-rich motif is  
975 not essential for energy transduction by *Escherichia coli* TonB protein. *Mol*  
976 *Microbiol* **10**:943-953.
- 977 25. **Skare JT, Roof SK, Postle K.** 1989. A mutation in the amino terminus of a  
978 hybrid TrpC-TonB protein relieves overproduction lethality and results in  
979 cytoplasmic accumulation. *J. Bacteriol.* **171**:4442-4447.

- 980 26. **Vakharia-Rao H, Kastead KA, Savenkova MI, Bulathsinghala CM,**  
981 **Postle K.** 2007. Deletion and substitution analysis of the *Escherichia coli* TonB  
982 Q160 region. *J. Bacteriol.* **189**:4662-4670.
- 983 27. **Postle K, Kastead KA, Gresock MG, Ghosh J, Swayne CD.** 2010. The  
984 TonB dimeric crystal structures do not exist *in vivo*. *mBio* **1**:e00307-00310.
- 985 28. **Swayne C, Postle K.** 2011. Taking the *Escherichia coli* TonB  
986 transmembrane domain "Offline"? Non-protonatable Asn substitutes fully for  
987 TonB His20. *J. Bacteriol.* **193**:3693-3701.
- 988 29. **Ghosh J, Postle K.** 2004. Evidence for dynamic clustering of carboxy-  
989 terminal aromatic amino acids in TonB-dependent energy transduction. *Mol.*  
990 *Microbiol.* **51**:203-213.
- 991 30. **Cascales E, Buchanan SK, Duché D, Kleanthous C, Lloubes R, Postle K,**  
992 **Riley M, Slatin S, Cavard D.** 2007. Colicin Biology. *Micro. Mol. Biol. Rev.*  
993 **71**:158-229.
- 994 31. **Gresock MG, Kastead KA, Postle K.** 2015. From homodimer to  
995 heterodimer and back: Elucidating the TonB energy transduction cycle. *J.*  
996 *Bacteriol.* **197**:3433-3445.
- 997 32. **Higgs PI, Larsen RA, Postle K.** 2002. Quantitation of known components  
998 of the *Escherichia coli* TonB-dependent energy transduction system: TonB, ExbB,  
999 ExbD, and FepA. *Mol. Microbiol.* **44**:271-281.



- 1000 33. **Kadner RJ, Heller KJ.** 1995. Mutual inhibition of cobalamin and  
1001 siderophore uptake systems suggests their competition for TonB function. *J.*  
1002 *Bacteriol.* **177**:4829-4835.
- 1003 34. **Ollis AA, Postle K.** 2011. The same periplasmic ExbD residues mediate *in*  
1004 *vivo* interactions between ExbD homodimers and ExbD-TonB heterodimers. *J.*  
1005 *Bacteriol.* **193**:6852-6863.
- 1006 35. **Ollis AA, Postle K.** 2012. Identification of functionally important TonB-  
1007 ExbD periplasmic domain interactions *in vivo*. *J. Bacteriol.* **194**:3078-3087.
- 1008 36. **Endriss F, Braun M, Killmann H, Braun V.** 2003. Mutant analysis of the  
1009 *Escherichia coli* FhuA protein reveals sites of FhuA activity. *J. Bacteriol.*  
1010 **185**:4683-4692.
- 1011 37. **Larsen RA, FosterHartnett D, McIntosh MA, Postle K.** 1997. Regions of  
1012 *Escherichia coli* TonB and FepA proteins essential for *in vivo* physical  
1013 interactions. *J. Bacteriol.* **179**:3213-3221.
- 1014 38. **Evans JS, Levine BA, Trayer IP, Dorman CJ, Higgins CF.** 1986.  
1015 Sequence-imposed structural constraints in the TonB protein of *E. coli*. *FEBS Lett.*  
1016 **208**:211-216.
- 1017 39. **Seliger SS, Mey AR, Valle AM, Payne SM.** 2001. The two TonB systems  
1018 of *Vibrio cholerae*: redundant and specific functions. *Mol. Microbiol.* **39**:801-812.

- 1019 40. **Gresock MG, Postle K.** 2017. Going outside the TonB Box: Identification  
1020 of novel FepA-TonB interactions *in vivo*. J. Bacteriol. **199**:e00649-00616.
- 1021 41. **Postle K, Good RF.** 1983. DNA sequence of the *Escherichia coli tonB*  
1022 gene. Proc. Natl. Acad. Sci. USA **80**:5235-5239.
- 1023 42. **Larsen RA, Chen GJ, Postle K.** 2003. Performance of standard phenotypic  
1024 assays for TonB activity, as evaluated by varying the level of functional, wild-type  
1025 TonB. J. Bacteriol. **185**:4699-4706.
- 1026 43. **Letain TE, Postle K.** 1997. TonB protein appears to transduce energy by  
1027 shuttling between the cytoplasmic membrane and the outer membrane in Gram-  
1028 negative bacteria. Mol. Microbiol. **24**:271-283.
- 1029 44. **Larsen RA, Deckert GE, Kastead KA, Devanathan S, Keller KL, Postle**  
1030 **K.** 2007. His20 provides the sole functionally significant side chain in the essential  
1031 TonB transmembrane domain. J. Bacteriol. **189**:2825-2833.
- 1032 45. **Shultis DD, Purdy MD, Banchs CN, Wiener MC.** 2006. Outer membrane  
1033 active transport: structure of the BtuB:TonB complex. Science **312**:1396-1399.
- 1034 46. **Kaserer WA, Jiang X, Xiao Q, Scott DC, Bauler M, Copeland D,**  
1035 **Newton SM, Klebba PE.** 2008. Insight from TonB hybrid proteins into the  
1036 mechanism of iron transport through the outer membrane. J. Bacteriol. **190**:4001-  
1037 4016.

- 1038 47. **Higgs PI, Letain TE, Merriam KK, Burke NS, Park H, Kang C, Postle**  
1039 **K.** 2002. TonB interacts with nonreceptor proteins in the outer membrane of  
1040 *Escherichia coli*. *J. Bacteriol.* **184**:1640-1648.
- 1041 48. **Heller KJ, Kadner RJ, Günter K.** 1988. Suppression of the *btuB451*  
1042 mutation by mutations in the *tonB* gene suggests a direct interaction between TonB  
1043 and TonB-dependent receptor proteins in the outer membrane of *Escherichia coli*.  
1044 *Gene* **64**: 147-153.
- 1045 49. **Bell PE, Nau CD, Brown JT, Konisky J, Kadner RJ.** 1990. Genetic  
1046 suppression demonstrates direct interaction of TonB protein with outer membrane  
1047 transport proteins in *Escherichia coli*. *J. Bacteriol.* **172**:3826-3829.
- 1048 50. **Cadieux N, Bradbeer C, Kadner RJ.** 2000. Sequence changes in the ton  
1049 box region of BtuB affect its transport activities and interaction with TonB protein.  
1050 *J. Bacteriol.* **182**:5954-5961.
- 1051 51. **Mende J, Braun V.** 1990. Import-defective colicin B derivatives mutated in  
1052 the TonB box. *Mol. Microbiol.* **4**:1523-1533.
- 1053 52. **Majumdar A, Trinh V, Moore KJ, Smallwood CR, Kumar A, Yang T,**  
1054 **Scott DC, Long NJ, Newton SM, Klebba PE.** 2020. Conformational  
1055 rearrangements in the N-domain of *Escherichia coli* FepA during ferric  
1056 enterobactin transport. *J. Biol. Chem.* **295**:4974-4984.

- 1057 53. **Chimento DP, Kadner RJ, Wiener MC.** 2005. Comparative structural  
1058 analysis of TonB-dependent outer membrane transporters: implications for the  
1059 transport cycle. *Proteins* **59**:240-251.
- 1060 54. **Chakraborty R, Storey E, van der Helm D.** 2006. Molecular mechanism  
1061 of ferrisiderophore passage through the outer membrane receptor proteins of  
1062 *Escherichia coli*. *Biometals* **20**:263-274.
- 1063 55. **Barnard TJ, Watson ME, Jr., McIntosh MA.** 2001. Mutations in the  
1064 *Escherichia coli* receptor FepA reveal residues involved in ligand binding and  
1065 transport. *Mol. Microbiol.* **41**:527-536.
- 1066 56. **Carter DM, Gagnon JN, Damlaj M, Mandava S, Makowski L, Rodi DJ,**  
1067 **Pawelek PD, Coulton JW.** 2006. Phage display reveals multiple contact sites  
1068 between FhuA, an outer membrane receptor of *Escherichia coli*, and TonB. *J. Mol.*  
1069 *Biol.* **357**:236-251.
- 1070 57. **Nilaweera TD, Nyenhuis DA, Cafiso DS.** 2021. Structural intermediates  
1071 observed only in intact *Escherichia coli* indicate a mechanism for TonB-dependent  
1072 transport. *Elife* **10**:e68548.
- 1073 58. **Larsen RA, Letain TE, Postle K.** 2003. *In vivo* evidence of TonB shuttling  
1074 between the cytoplasmic and outer membrane in *Escherichia coli*. *Mol. Microbiol.*  
1075 **49**:211-218.

- 1076 59. **Bitter W, Tommassen J, Weisbeek PJ.** 1993. Identification and  
1077 characterization of the *exbB*, *exbD* and *tonB* Genes of *Pseudomonas putida*  
1078 WCS358 - Their involvement in ferric pseudobactin transport. *Mol. Microbiol.*  
1079 **7**:117-130.
- 1080 60. **Buchanan SK, Smith BS, Venkatramani L, Xia D, Esser L, Palnitkar M,**  
1081 **Chakraborty R, van der Helm D, Deisenhofer J.** 1999. Crystal structure of the  
1082 outer membrane active transporter FepA from *Escherichia coli*. *Nat. Struct. Biol.*  
1083 **6**:56-63.
- 1084 61. **Hilsenbeck JL, Park H, Chen G, Youn B, Postle K, Kang C.** 2004.  
1085 Crystal structure of the cytotoxic bacterial protein colicin B at 2.5 Å resolution.  
1086 *Mol. Microbiol.* **51**:711-720.
- 1087 62. **White P, Joshi A, Rassam P, Housden NG, Kaminska R, Goult JD,**  
1088 **Redfield C, McCaughey LC, Walker D, Mohammed S, Kleanthous C.** 2017.  
1089 Exploitation of an iron transporter for bacterial protein antibiotic import. *Proc.*  
1090 *Natl. Acad. Sci. USA* **114**:12051-12056.
- 1091 63. **Hullmann J, Patzer SI, Romer C, Hantke K, Braun V.** 2008. Periplasmic  
1092 chaperone FkpA is essential for imported colicin M toxicity. *Mol. Microbiol.*  
1093 **69**:926-937.
- 1094 64. **Landeta C, Boyd D, Beckwith J.** 2018. Disulfide bond formation in  
1095 prokaryotes. *Nat. Microbiol.* **3**:270-280.

- 1096 65. **Kopp DR, Postle K.** 2020. The intrinsically disordered region of ExbD is  
1097 required for signal transduction. *J. Bacteriol.* **202**:e00687-00619.
- 1098 66. **Mann BJ, Holroyd CD, Bradbeer C, Kadner RJ.** 1986. Reduced activity  
1099 of TonB-dependent functions in strains of *Escherichia coli*. *FEMS Lett.* **33**:255-  
1100 260.
- 1101 67. **Larsen RA, Thomas MG, Postle K.** 1999. Protonmotive force, ExbB and  
1102 ligand-bound FepA drive conformational changes in TonB. *Mol. Microbiol.*  
1103 **31**:1809-1824.
- 1104 68. **Lee SK, Keasling JD.** 2005. A propionate-inducible expression system for  
1105 enteric bacteria. *Appl. Environ. Microbiol.* **71**:6856-6862.
- 1106 69. **Postle K.** 2007. TonB system, *in vivo* assays and characterization. *Methods*  
1107 *Enzymol.* **422**:245-269.
- 1108 70. **Laemmli UK.** 1970. Cleavage of structural proteins during the assembly of  
1109 the head of bacteriophage T4. *Nature* **227**:680-685.
- 1110 71. **Larsen RA, Myers PS, Skare JT, Seachord CL, Darveau RP, Postle K.**  
1111 1996. Identification of TonB homologs in the family *Enterobacteriaceae* and  
1112 evidence for conservation of TonB-dependent energy transduction complexes. *J.*  
1113 *Bacteriol.* **178**:1363-1373.
- 1114 72. **Skare JT, Postle K.** 1991. Evidence for a TonB-dependent energy  
1115 transduction complex in *Escherichia coli*. *Mol. Microbiol.* **5**:2883-2890.

- 1116 73. **Hill CW, Harnish BW.** 1981. Inversions between ribosomal RNA genes of  
1117 *Escherichia coli*. Proc. Natl. Acad. Sci. USA **78**:7069-7072.
- 1118 74. **Baker KR, Postle K.** 2013. Mutations in *Escherichia coli* ExbB  
1119 transmembrane domains identify scaffolding and signal transduction functions and  
1120 exclude participation in a proton pathway. J. Bacteriol. **195**:2898-2911.
- 1121 75. **Chang C, Mooser A, Pluckthun A, Wlodawer A.** 2001. Crystal structure  
1122 of the dimeric C-terminal domain of TonB reveals a novel fold. J. Biol. Chem.  
1123 **276**:27535-27540.
- 1124 76. **Peacock SR, Weljie AM, Peter Howard S, Price FD, Vogel HJ.** 2005.  
1125 The solution structure of the C-terminal domain of TonB and interaction studies  
1126 with TonB box peptides. J. Mol. Biol. **345**:1185-1197.
- 1127 77. **Symmons MF, Bokma E, Koronakis E, Hughes C, Koronakis V.** 2009.  
1128 The assembled structure of a complete tripartite bacterial multidrug efflux pump.  
1129 Proc. Natl. Acad. Sci. USA **106**:7173-7178.
- 1130 78. **Drozdetskiy A, Cole C, Procter J, Barton GJ.** 2015. JPred4: a protein  
1131 secondary structure prediction server. Nucl. Acids Res. **43**:W389-394.  
1132

1133 **TABLES**

1134 **Table 1:** [<sup>55</sup>Fe]-enterochelin transport activities of TonB and FepA Cys substitutions

| Mutant               | Percent activity (%) relative to “wild-type” |
|----------------------|----------------------------------------------|
| TonB C18G            | 100                                          |
| TonB C18G Q160C      | 113                                          |
| TonB C18G M201C      | 95                                           |
| TonB C18G R204C      | 107                                          |
| TonB C18G V206C      | 71                                           |
| TonB C18G N208C      | 76                                           |
| TonB C18G A209C      | 65                                           |
| TonB C18G R212C      | 96                                           |
| TonB C18G R214C      | 75                                           |
| TonB C18G H20A Q160C | 5                                            |
| TonB C18G H20A M201C | 3                                            |
| TonB C18G H20A R204C | 3                                            |
| TonB C18G H20A N208C | 1                                            |
| TonB C18G H20A R212C | 2                                            |
| TonB C18G H20A R214C | 2                                            |
| FepA wild-type       | 100                                          |



---

|            |     |
|------------|-----|
| FepA V16C  | 91  |
| FepA L23C  | 79  |
| FepA S29C  | 98  |
| FepA T32C  | 92  |
| FepA A33C  | 89  |
| FepA D34C  | 115 |
| FepA E35C  | 86  |
| FepA A42C  | 77  |
| FepA S46C  | 76  |
| FepA T51C  | 85  |
| FepA G54C  | 86  |
| FepA R75C  | 40  |
| FepA L85C  | 107 |
| FepA V91C  | 84  |
| FepA S92C  | 101 |
| FepA S112C | 105 |
| FepA E120C | 83  |
| FepA V124C | 102 |
| FepA R126C | 46  |
| FepA A131C | 72  |

---

---

|            |     |
|------------|-----|
| FepA V142C | 78  |
| FepA I145C | 84  |
| FepA E152C | 62  |
| FepA D185C | 118 |
| FepA P243C | 106 |
| FepA D298C | 126 |
| FepA D356C | 115 |
| FepA D422C | 109 |
| FepA D455C | 121 |
| FepA E511C | 92  |
| FepA D519C | 136 |
| FepA E567C | 65  |
| FepA E576C | 134 |
| FepA D618C | 104 |
| FepA D664C | 105 |
| FepA T722C | 60  |

---

1135

1136

1137

1138 **Table 2:** Strains and plasmids

| Strain or plasmid | Genotype                                                                                                                                                                        | Reference         |
|-------------------|---------------------------------------------------------------------------------------------------------------------------------------------------------------------------------|-------------------|
| Strains           |                                                                                                                                                                                 |                   |
| DH5 $\alpha$      | F- $\Phi$ 80d/ <i>acZ</i> $\Delta$ M15 $\Delta$ ( <i>lacZYA-argF</i> ) U169 <i>deoR</i><br><i>recA1 endA1 hsdR17</i> (rk-, mk+) <i>phoA supE44</i> l- <i>thi-1 gyrA96 relA1</i> | Life Technologies |
| W3110             | F- IN( <i>rrnD-rrnE</i> )1                                                                                                                                                      | (73)              |
| KP1270            | W3110 <i>aroB</i>                                                                                                                                                               | (67)              |
| KP1344            | W3110 $\Delta$ ( <i>tonB, P14</i> :: <i>blaM</i> )                                                                                                                              | (67)              |
| KP1406            | W3110 <i>aroB</i> $\Delta$ ( <i>tonB, P14</i> :: <i>blaM</i> )                                                                                                                  | (11)              |
| KP1477            | W3110 $\Delta$ ( <i>tonB, P14</i> :: <i>kan</i> )                                                                                                                               | (12)              |
| KP1487            | W3110 $\Delta$ <i>fepA</i> :: <i>kan</i>                                                                                                                                        | (40)              |
| KP1489            | W3110 $\Delta$ <i>fepA</i> , a derivative of KP1487                                                                                                                             | (40)              |
| KP1490            | W3110 <i>aroB</i> $\Delta$ <i>fepA</i>                                                                                                                                          | (12)              |
| KP1491            | W3110 $\Delta$ <i>fepA</i> ( <i>tonB, P14</i> :: <i>kan</i> )                                                                                                                   | Present study     |
| RA1021            | W3110 $\Delta$ <i>exbD</i>                                                                                                                                                      | (18)              |
| TonB Plasmids     |                                                                                                                                                                                 |                   |
| pKP325            | Wild-type TonB in pACYC184                                                                                                                                                      | (67)              |
| pKP372            | TonB amphipathic helix frameshift in pKP325                                                                                                                                     | Present study     |
| pKP1859           | pKP372, C18G                                                                                                                                                                    | Present study     |

|         |                                                      |               |
|---------|------------------------------------------------------|---------------|
| pKP442  | Wild-type TonB in pKP325, silent XhoI site           | (29)          |
| pKP568  | pKP442 with TonB C18G                                | (29)          |
| pKP531  | pKP442 with TonB F202A, W213A                        | (29)          |
| pKP532  | pKP442 with TonB F202A, Y215A                        | (29)          |
| pKP476  | pKP442 with TonB $\Delta$ 199-216                    | Present study |
| pKP1858 | pKP476, C18G                                         | Present study |
| pKP1362 | TonB C18G in pPro33                                  | Present study |
| pKP1427 | TonB C18G Q160C, a derivative of pKP1362             | Present study |
| pKP2303 | TonB C18G Q160C F202A, a derivative of pKP1427       | Present study |
| pKP2304 | TonB C18G Q160C F202A W213A, a derivative of pKP2303 | Present study |
| pKP1676 | TonB C18G M201C, a derivative of pKP1362             | Present study |
| pKP1867 | TonB C18G R204C, a derivative of pKP1362             | Present study |
| pKP1683 | TonB C18G V206C, a derivative of pKP1362             | Present study |
| pKP1646 | TonB C18G N208C, a derivative of pKP1362             | Present study |
| pKP1647 | TonB C18G A209C, a derivative of pKP1362             | Present study |
| pKP1624 | TonB C18G R212C, a derivative of pKP1362             | Present study |
| pKP1684 | TonB C18G R214C, a derivative of pKP1362             | Present study |
| pKP1708 | TonB C18G H20A Q160C, a derivative of pKP1427        | Present study |
| pKP1720 | TonB C18G H20A M201C, a derivative of pKP1676        | Present study |

|         |                                               |               |
|---------|-----------------------------------------------|---------------|
| pKP1868 | TonB C18G H20A R204C, a derivative of pKP1645 | Present study |
| pKP1722 | TonB C18G H20A V206C, a derivative of pKP1683 | Present study |
| pKP1692 | TonB C18G H20A N208C, a derivative of pKP1646 | Present study |
| pKP2299 | TonB C18G H20A V209C, a derivative of pKP1647 | Present study |
| pKP1861 | TonB C18G H20A R212C, a derivative of pKP1624 | Present study |
| pKP1723 | TonB C18G H20A R214C, a derivative of pKP1684 | Present study |

---

#### FepA plasmids

|         |                                                                         |               |
|---------|-------------------------------------------------------------------------|---------------|
| pKP515  | WT FepA in pBAD24                                                       | (11)          |
| pKP1410 | FepA D12C, a pKP515 derivative                                          | Present study |
| pKP718  | FepA T13C, a pKP515 derivative                                          | (12)          |
| pKP1411 | FepA I14C, a pKP515 derivative                                          | Present study |
| pKP1383 | FepA V15C, a pKP515 derivative                                          | Present study |
| pKP1384 | FepA V16C, a pKP515 derivative                                          | Present study |
| pKP1416 | FepA T17C, a pKP515 derivative                                          | Present study |
| pKP1626 | FepA D34C, $\Delta$ TonB box (residues 12-16),<br>derivative of pKP1583 | Present study |
| pKP1627 | FepA G54C, $\Delta$ TonB box (residues 12-16),<br>derivative of pKP1382 | Present study |
| pKP1582 | FepA L23C, a pKP515 derivative                                          | Present study |

|         |                                 |               |
|---------|---------------------------------|---------------|
| pKP719  | FepA S29C, a pKP515 derivative  | (12)          |
| pKP1577 | FepA T32C, a pKP515 derivative  | Present study |
| pKP728  | FepA A33C, a pKP515 derivative  | (12)          |
| pKP1583 | FepA D34C, a pKP515 derivative  | Present study |
| pKP1578 | FepA E35C, a pKP515 derivative  | Present study |
| pKP720  | FepA A42C, a pKP515 derivative  | (12)          |
| pKP729  | FepA S46C, a pKP515 derivative  | (12)          |
| pKP730  | FepA T51C, a pKP515 derivative  | (12)          |
| pKP1382 | FepA G54C, a pKP515 derivative  | Present study |
| pKP1400 | FepA R75C, a pKP515 derivative  | Present study |
| pKP1581 | FepA L85C, a pKP515 derivative  | Present study |
| pKP731  | FepA V91C, a pKP515 derivative  | (12)          |
| pKP721  | FepA S92C, a pKP515 derivative  | (12)          |
| pKP732  | FepA S112C, a pKP515 derivative | (12)          |
| pKP1836 | FepA E120C, a pKP515 derivative | Present study |
| pKP733  | FepA V124C, a pKP515 derivative | (12)          |
| pKP1506 | FepA R126C, a pKP515 derivative | Present study |
| pKP1854 | FepA A131C, a pKP515 derivative | Present study |
| pKP1841 | FepA V142C, a pKP515 derivative | Present study |
| pKP1837 | FepA I145C, a pKP515 derivative | Present study |

|         |                                 |               |
|---------|---------------------------------|---------------|
| pKP1857 | FepA E152C, a pKP515 derivative | Present study |
| pKP1369 | FepA D185C, a pKP515 derivative | Present study |
| pKP1864 | FepA P243C, a pKP515 derivative | Present study |
| pKP1361 | FepA D298C, a pKP515 derivative | Present study |
| pKP1685 | FepA D356C, a pKP515 derivative | Present study |
| pKP1726 | FepA D422C, a pKP515 derivative | Present study |
| pKP1656 | FepA D455C, a pKP515 derivative | Present study |
| pKP1609 | FepA E511C, a pKP515 derivative | Present study |
| pKP1410 | FepA D519C, a pKP515 derivative | Present study |
| pKP1610 | FepA E567C, a pKP515 derivative | Present study |
| pKP1793 | FepA E576C, a pKP515 derivative | Present study |
| pKP1370 | FepA D618C, a pKP515 derivative | Present study |
| pKP1727 | FepA D664C, a pKP515 derivative | Present study |
| pKP1850 | FepA T722C, a pKP515 derivative | Present study |

1140 **FIGURES**

1141

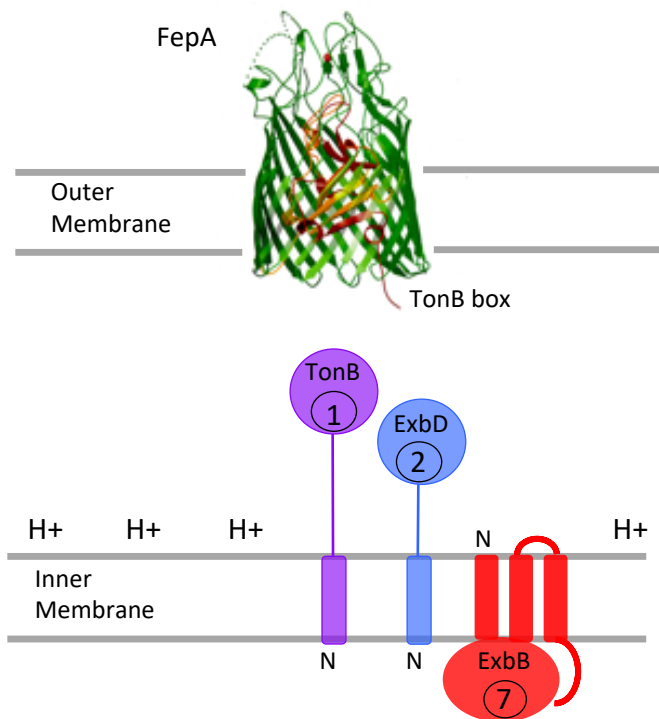

1142

1143 **Figure 1. The TonB system of *Escherichia coli* K12.** The TonB-dependent  
1144 transporter, FepA, is shown in the outer membrane. At its extreme amino terminus,  
1145 the TonB box, the only known site of *in vivo* interaction with TonB, is shown  
1146 protruding into the periplasm. The topologies and cellular ratios of the cytoplasmic  
1147 membrane proteins TonB, ExbB and ExbD are shown in the cytoplasmic  
1148 membrane. The protonmotive force gradient of the cytoplasmic membrane (H<sup>+</sup>) is  
1149 shown. The crystal structure of FepA was solved by Buchanan et al. (60).

1150

1151



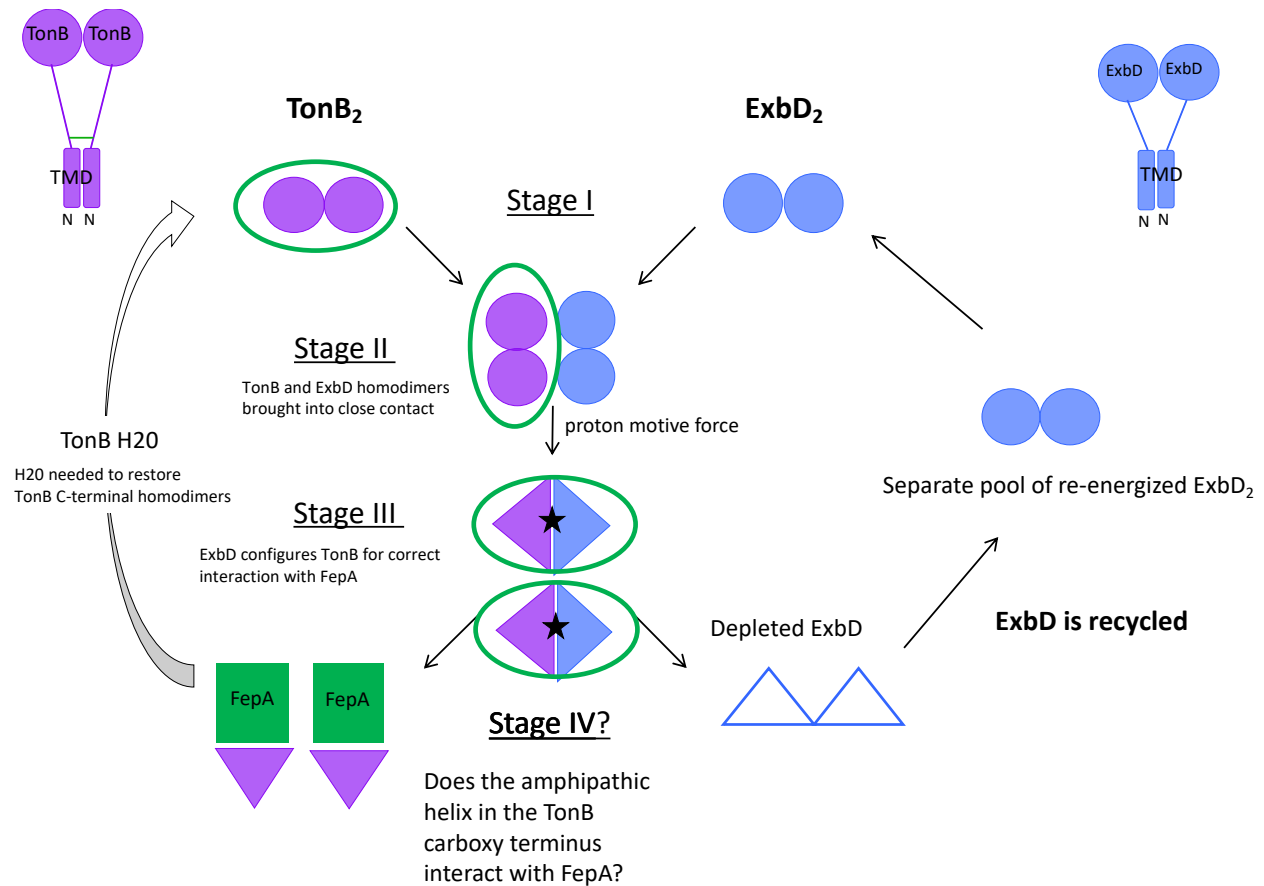

1152

1153

1154 **Figure 2. Key *in vivo* interactions of the TonB carboxy terminus during the**

1155 **energy transduction cycle involve the amphipathic helix (residues 199-216)**

1156 **[adapted from (31).].** Full length TonB (purple, upper left corner) and ExbD

1157 (blue, upper right corner) each have a single transmembrane domain signal anchor

1158 in the cytoplasmic membrane with the bulk of the residues occupying the

1159 periplasmic space. Filled purple circles/triangles are TonB carboxy termini. Filled

1160 blue circles/triangles are ExbD carboxy termini. The TonB amino terminal domain

1161 remains homodimerized throughout the cycle, with its periplasmic carboxy

1162 terminus undergoing sequential protein-protein interactions (31). Interactions of  
1163 the periplasmic carboxy-terminal domains of both TonB<sub>2</sub> and ExbD<sub>2</sub> homodimers  
1164 are shown. In Stage I, H20 in the TonB transmembrane domain is required for  
1165 TonB carboxy termini to form obligatory homodimers through residues in and near  
1166 the carboxy terminal amphipathic helix (residues 199-216), (17, 31). ExbB  
1167 tetramers (ExbB<sub>4</sub>) independently stabilize both TonB<sub>2</sub> and ExbD<sub>2</sub>, homodimerized  
1168 through their carboxy termini, and are proposed to be the scaffolds upon which  
1169 TonB<sub>2</sub> and ExbD<sub>2</sub> are independently assembled (ExbB<sub>4</sub> is not shown). In Stage II,  
1170 TonB<sub>2</sub> and ExbD<sub>2</sub> homodimers are brought into close contact by ExbB tetramers  
1171 but have not yet formed the heterodimers of the subsequent Stage. In Stage III, in  
1172 the presence of the cytoplasmic membrane protonmotive force (PMF), the TonB<sub>2</sub>  
1173 and ExbD<sub>2</sub> carboxy termini reassort to form two TonB-ExbD heterodimers. ExbD,  
1174 which contains the sole potentially PMF-responsive residue (Asp25) among five  
1175 transmembrane domains that make up the TonB system, configures TonB correctly  
1176 for a productive interaction with FepA [(28, 74); Jana and Postle, unpublished].  
1177 This is necessary because inactive TonB also binds to TBDTs but without energy  
1178 transduction, meaning that the correct configuration must be based on prior  
1179 interaction with ExbD. Stage IV is binding of a monomeric carboxy terminus of  
1180 TonB to FepA, such that active transport of the siderophore enterochelin across the  
1181 outer membrane occurs. Notably, the TonB amphipathic helix makes important

1182 contacts with another TonB or ExbD in Stages I-III (green circles), however it has  
1183 never been tested for important contacts with FepA (green square). After a  
1184 transport event, H<sub>2</sub>O is required for re-formation of TonB dimers in Stage I.  
1185 ExbD<sub>2</sub> is de-energized after this event (empty blue triangles) and needs to be  
1186 recycled. We speculate that ExbD<sub>2</sub> moves in and out of the complex escorted by  
1187 ExbB tetramers. A separate pool of recycled ExbB<sub>4</sub>-ExbD<sub>2</sub> is hypothesized to  
1188 exist to replenish Stage I ExbB<sub>4</sub>-ExbD homodimers. See (31) for a full explanation  
1189 of the experimental basis for the model.

1190

1191

1192

1193

1194

1195

1196

1197

1198

1199

1200

1201

1202

1203

1204

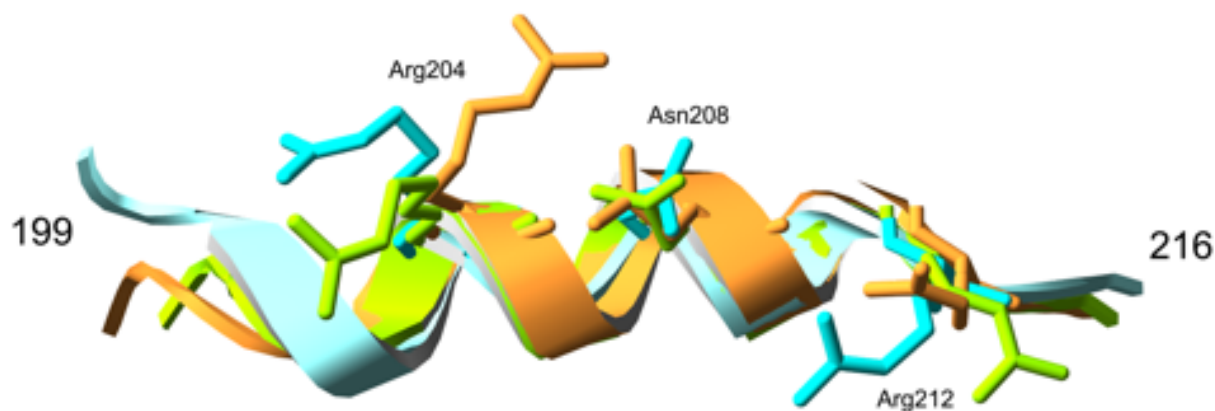

1205

1206

1207 **Figure 3. Superimposition of the TonB amphipathic helices from TonB crystal**

1208 **structures.** Blue is from Chang et al. (75); green is from Peacock et al. (76); gold

1209 is from Shultis et al. (45). The hydrophilic residues that, as Cys substitutions,

1210 interact with the FepA TonB box Cys substitutions in Fig. 7 are shown.

1211

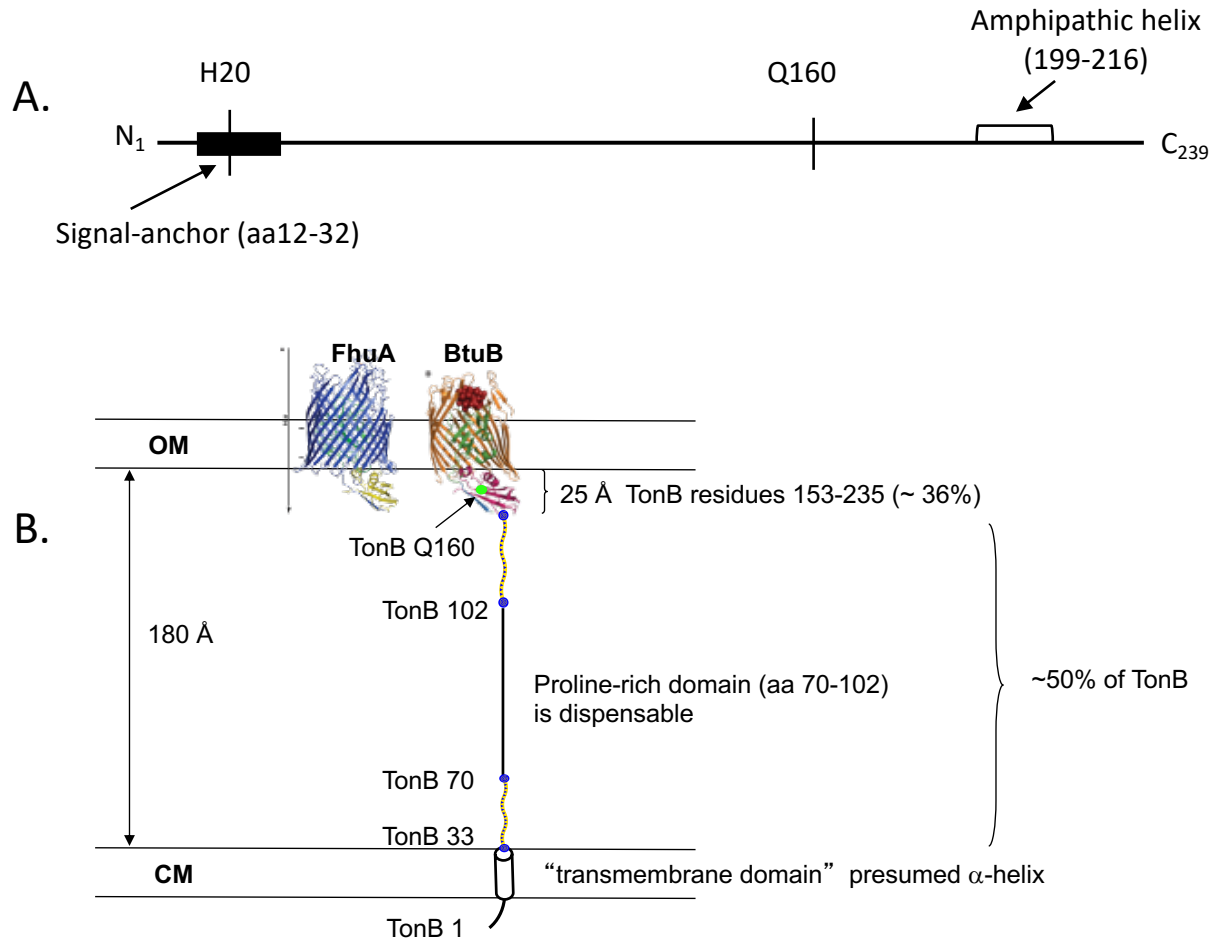

1212

1213

1214 **Figure 4. TonB protein information.** (A) Relevant features of the TonB

1215 primary amino acid sequence (residues 1-239) are shown. H20 in the TonB

1216 transmembrane signal anchor domain renders TonB inactive when substituted with

1217 alanine (44). Locations of TonB Q160 and the amphipathic helix are shown. (B)

1218 The conformation of TonB predicted by the crystal structures of its carboxy

1219 terminus would be unable to reach the TBDTs. TonB residues 33–69 and 103–149,

1220 predicted to be intrinsically disordered regions (44) are depicted as yellow

1221 rectangles. TonB Q160 is the green dot within the structured carboxy terminus of  
1222 the BtuB-TonB structure. The proline-rich domain, which contributes ~ 100 Å to  
1223 the extension of TonB across the periplasmic space (38), can be deleted without  
1224 inactivating TonB (24, 39). The span of the periplasmic space was estimated based  
1225 on crystal structure reconstructions of the AcrA/B/TolC complex which has  
1226 proteins in both outer and cytoplasmic membranes (77). The crystal structure of  
1227 FhuA-TonB is from Pawelek et al. (20). The crystal structure of BtuB-TonB is  
1228 from Shultis et al. (45). Part B of this figure is from (44). Abbreviations: CM,  
1229 cytoplasmic membrane; OM, outer membrane.

1230

1231

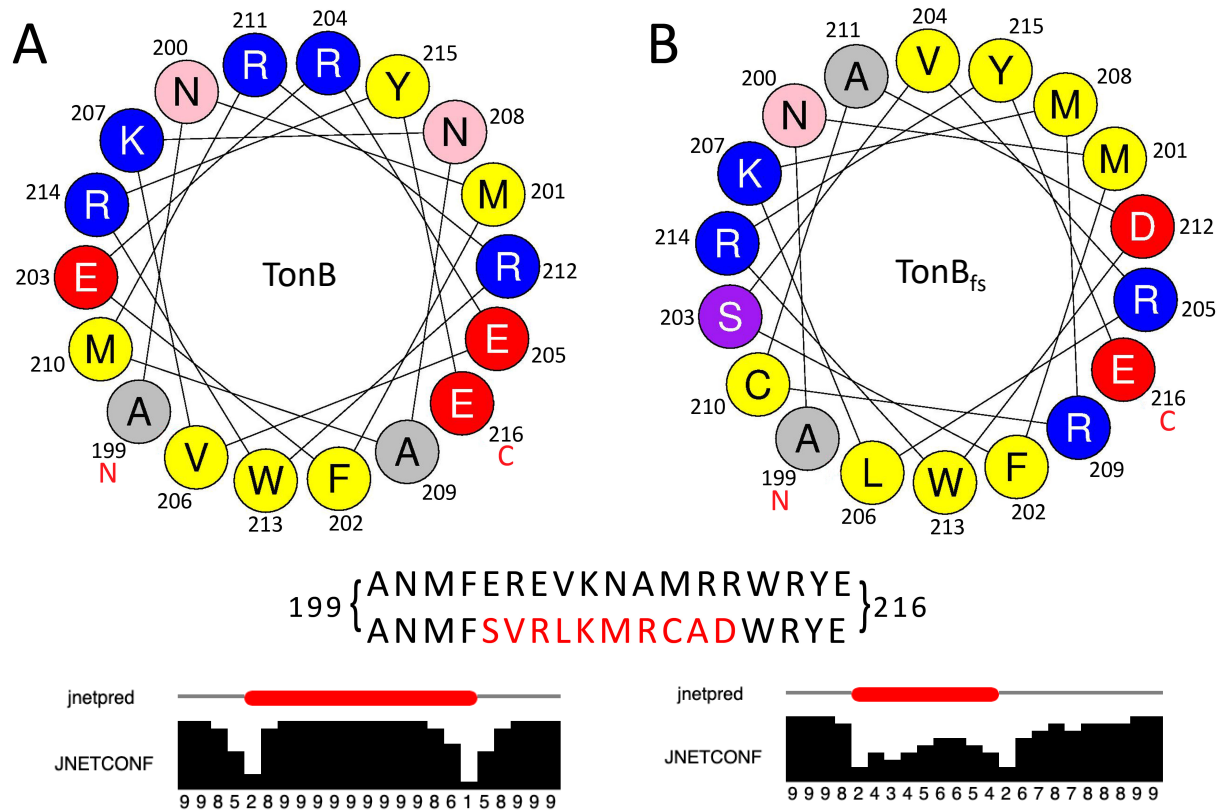

1232

1233

1234 **Figure 5. Comparison of wild type TonB and frame-shifted (TonB<sub>fs</sub>)**

1235 **amphipathic helix regions (residues 199-216).** (A) Helical wheel diagram of the

1236 TonB amphipathic helix and its corresponding JPRED4 prediction (bottom) as

1237 compared to (B) the corresponding frame-shifted region of TonB presented in a

1238 helical wheel diagram with its corresponding JPRED4 prediction (bottom). For

1239 JNetPred, predicted helices are shown in red. For JNETCONF, high values along

1240 the bottom edge indicate high confidence in the prediction (78). The comparison of

1241 the two amino acid sequences is shown in the middle panel, with the frame-shifted

1242 residues noted in red. The frameshifted version has lost much but not all of its

1243 helical character and it resulted in multiple substitutions in the core helix residues

1244 203-212.

1245

1246



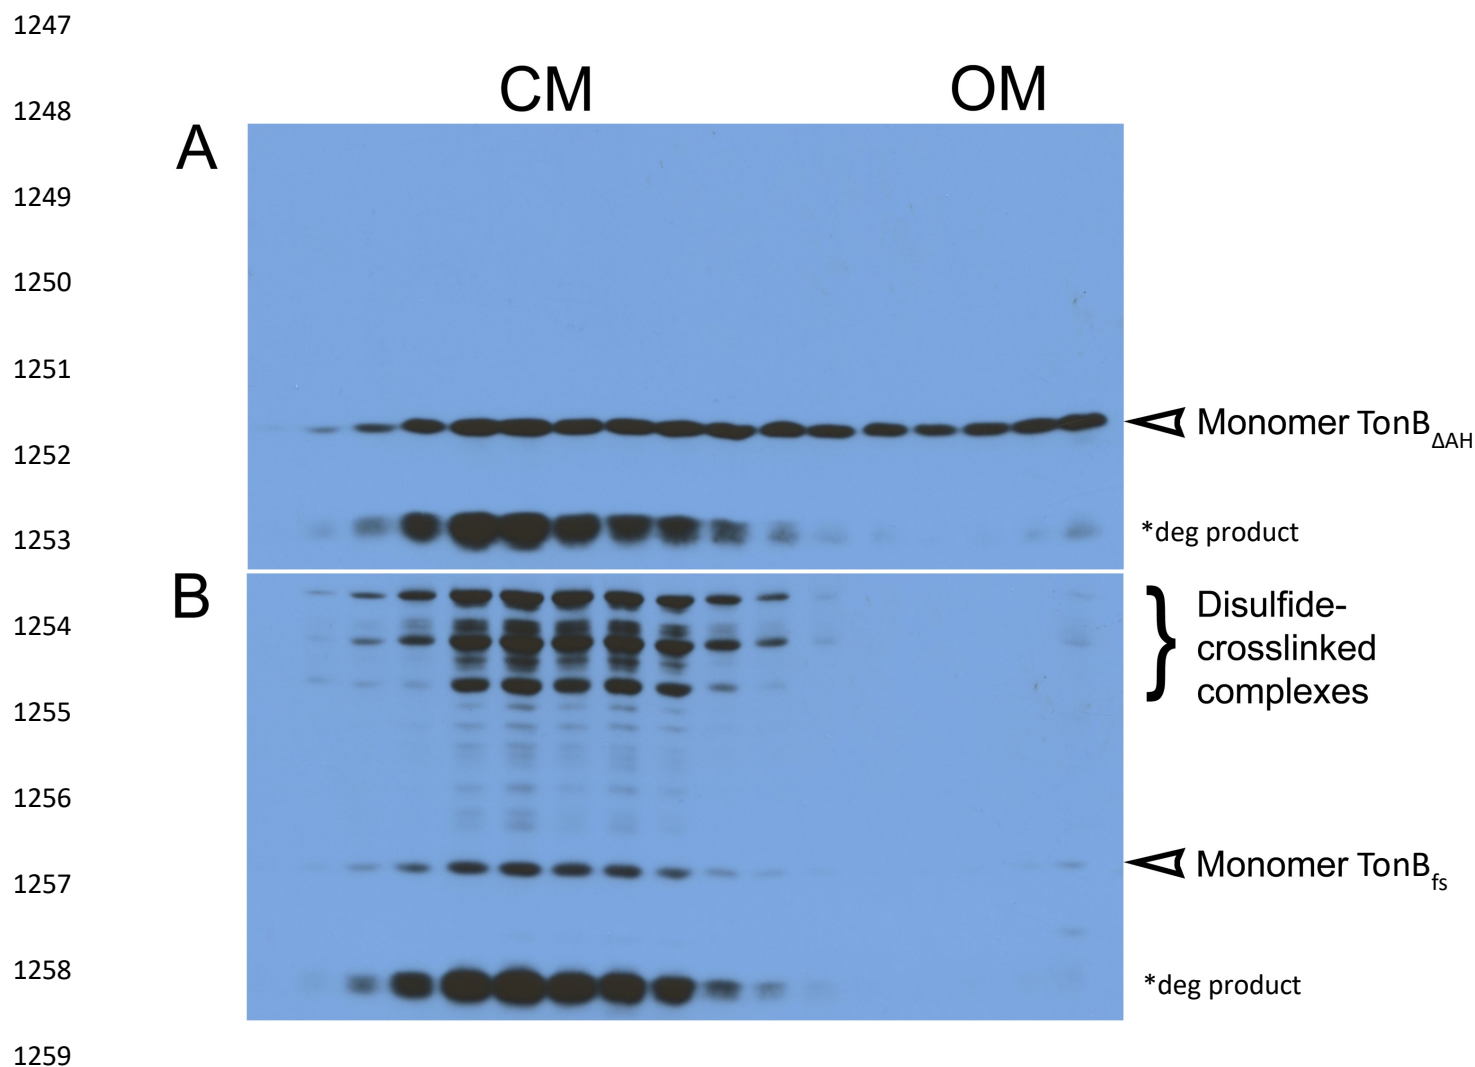

1260 **Figure 6. Monomeric TonB with major alterations of its amphipathic helix**  
1261 **retains its ability to associate with the outer membrane.** Wild-type TonB  
1262 fractionates ~ 40% with the outer membrane and ~ 60% with the cytoplasmic  
1263 membrane (43). (A) Sucrose density gradient fractionation of TonB $_{\Delta AH}$ , where  
1264 TonB associates with both membranes. (B) Sucrose density gradient fractionation  
1265 of TonB $_{fs}$ . Because most of the TonB $_{fs}$  is trapped as triplet homodimers through  
1266 M210C that cannot associate with the outer membrane (17, 31), only a small

1267 amount of monomer is apparent in OM fractions on this exposure. On longer  
1268 exposures, monomer TonB<sub>fs</sub> association with the outer membrane becomes more  
1269 apparent (data not shown). CM is for cytoplasmic membrane fractions; OM is for  
1270 outer membrane fractions. Immunoblots of SDS polyacrylamide gels with anti-  
1271 TonB monoclonal antibody are shown (71).

1272

1273

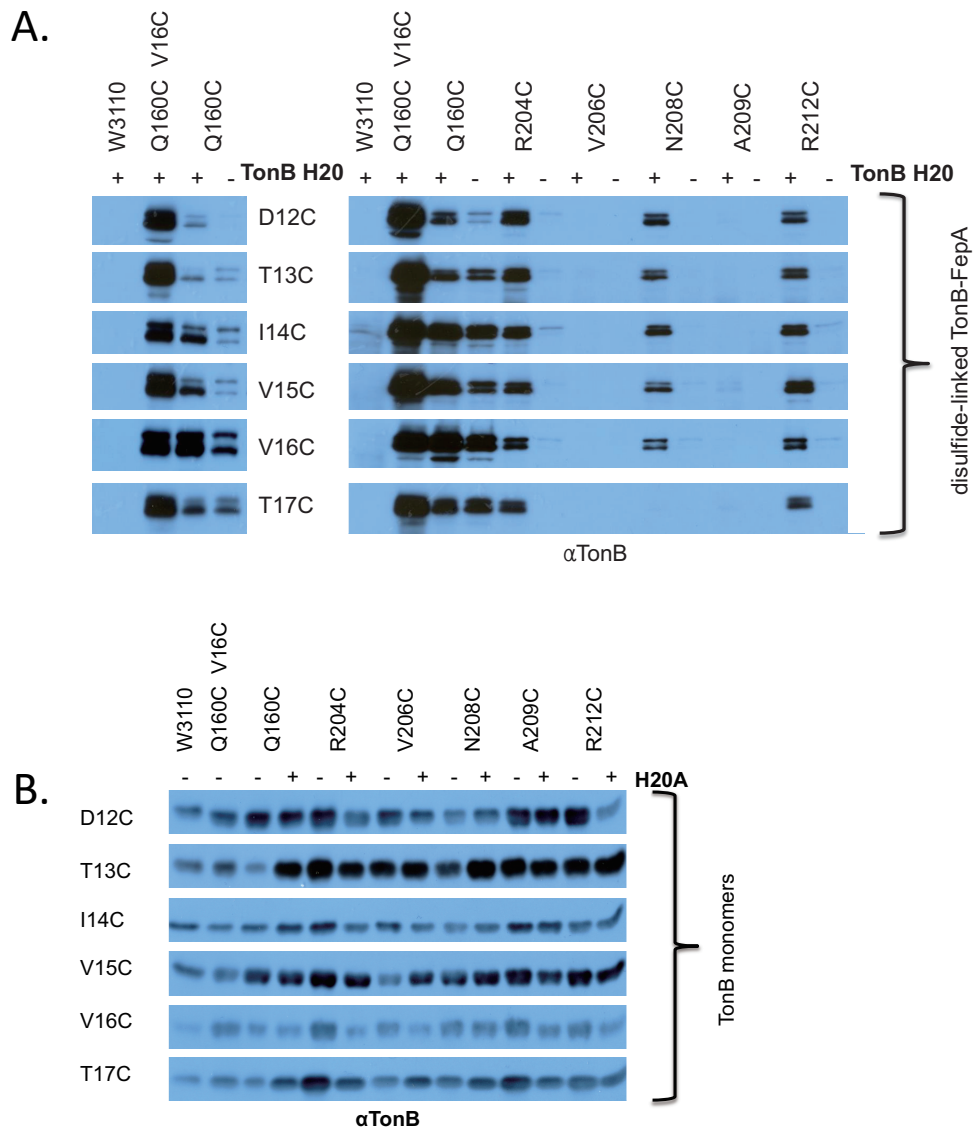

1274

1275 **Fig. 7. Cys substitutions in the essential TonB amphipathic helix form *in vivo***

1276 **disulfide crosslinks with FepA TonB box Cys substitutions.** Strain KP1491

1277 [W3110  $\Delta$ fepA,  $\Delta$ (tonB,P14)::kan] with various TonB and FepA plasmid

1278 combinations was grown and analyzed as described in Materials and Methods.

1279 TonB and its Cys substitutions are indicated across the top of the immunoblots.

1280 FepA Cys substitutions in the TonB box are indicated between the two panels (in  
1281 (A) or on the left side of the immunoblot in (B). (+) indicates the presence of the  
1282 wild-type H20 allele in the TonB transmembrane domain. (-) indicates the  
1283 presence of the inactivating H20A mutation. Immunoblots of the ~ 116 kDa region  
1284 of non-reducing SDS polyacrylamide gels developed with monoclonal anti-TonB  
1285 antibody are shown. (A) Wild-type control W3110 shows that wildtype TonB and  
1286 wildtype FepA do not innately form stable complexes. Panel right: TonB-FepA  
1287 disulfide-linked complexes are shown. Panel left: shorter exposures of the first  
1288 four lanes of panel right are shown. In panel left, the TonB Q160C-FepA V16C  
1289 pair demonstrated the most efficient crosslinking among five TonB FepA TonB  
1290 box Cys substitutions tested and was therefore used as a standard for relative levels  
1291 in all subsequent figures characterizing disulfide crosslinks. (B) Steady state levels  
1292 of chromosomally encoded TonB in W3110 and plasmid-encoded TonB variants  
1293 from samples in (A) are shown as immunoblots of the ~ 36 kDa region of reducing  
1294 SDS polyacrylamide gels developed with anti-TonB monoclonal antibody.

1295

1296

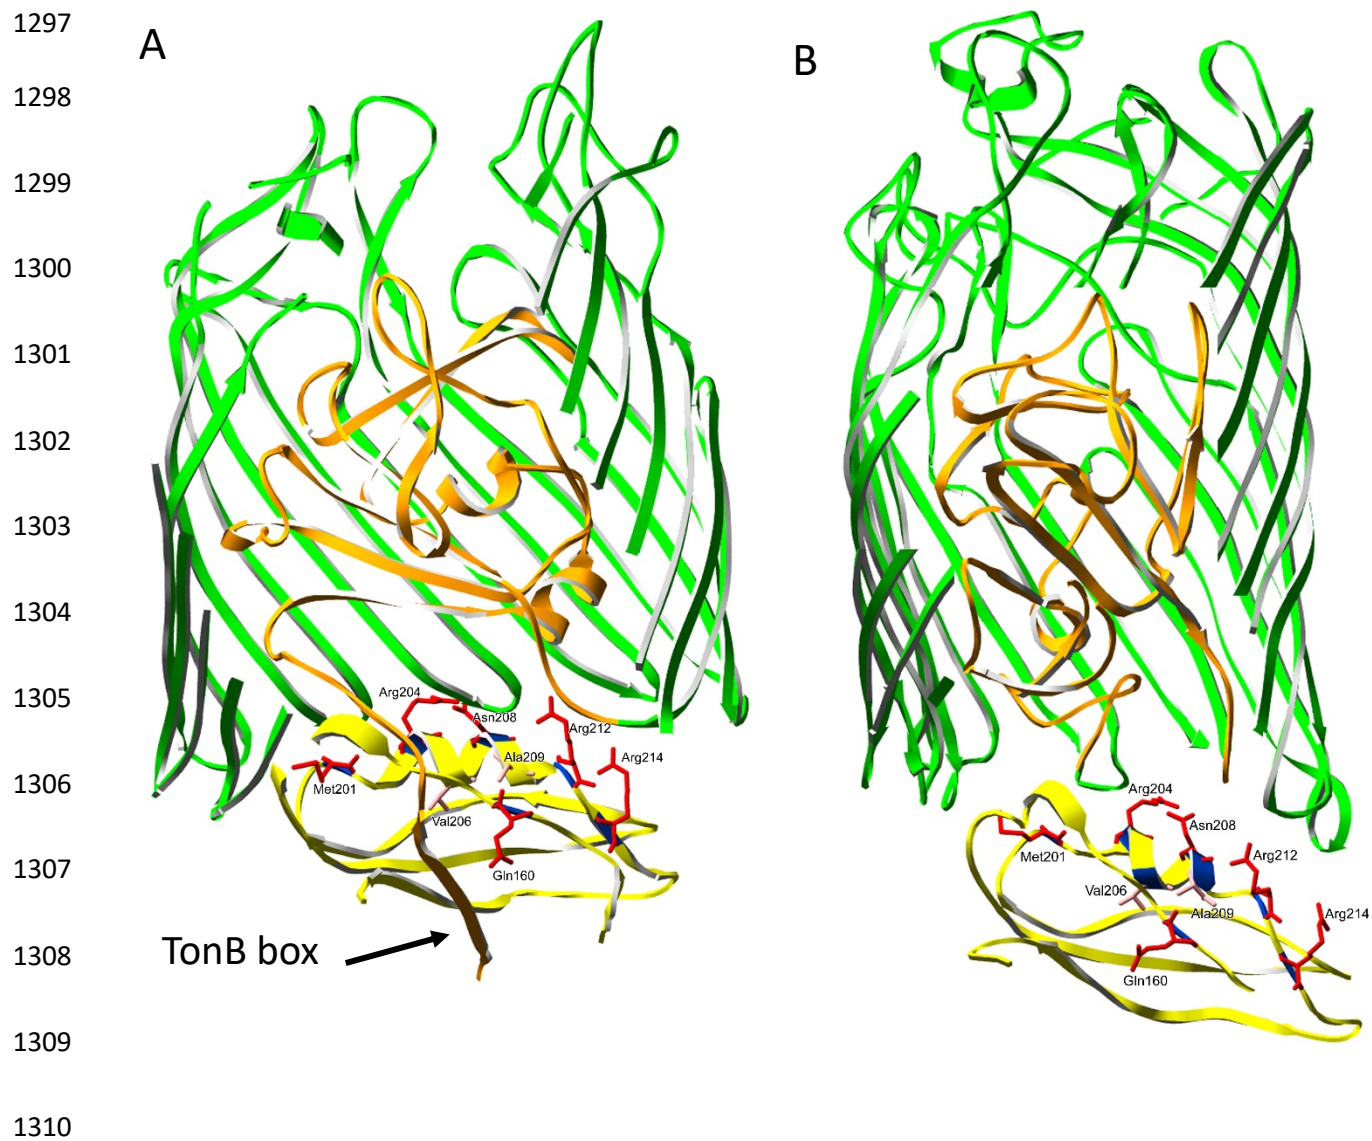

1311 **Figure 8: Ribbon diagrams of TonB Cys-substituted residues displayed on**  
1312 **TonB carboxy terminus co-crystal structures with BtuB [A; Shultis et al., (45)]**  
1313 **and FhuA [B; Pawelek et al., (20)].** TonB Cys substitutions from this study that  
1314 made disulfide crosslinks with a variety of Cys substitutions in FepA, including the  
1315 TonB box, are in red; those in pink (A206C and A209C) made no crosslinks. The  
1316 TonB box of BtuB is shown. The FhuA TonB box was not visible in the FhuA-

1317 TonB structure. The authors of that study propose that FhuA TonB box residues  
1318 I9, T10, V11, and A13 interact with TonB residues V225, V226, L229, and K231  
1319 on one side and with TonB Q160 on the other (20).

1320

1321

1322

1323

1324

1325

1326

1327

1328

1329

1330

1331

1332

1333

1334

1335

1336



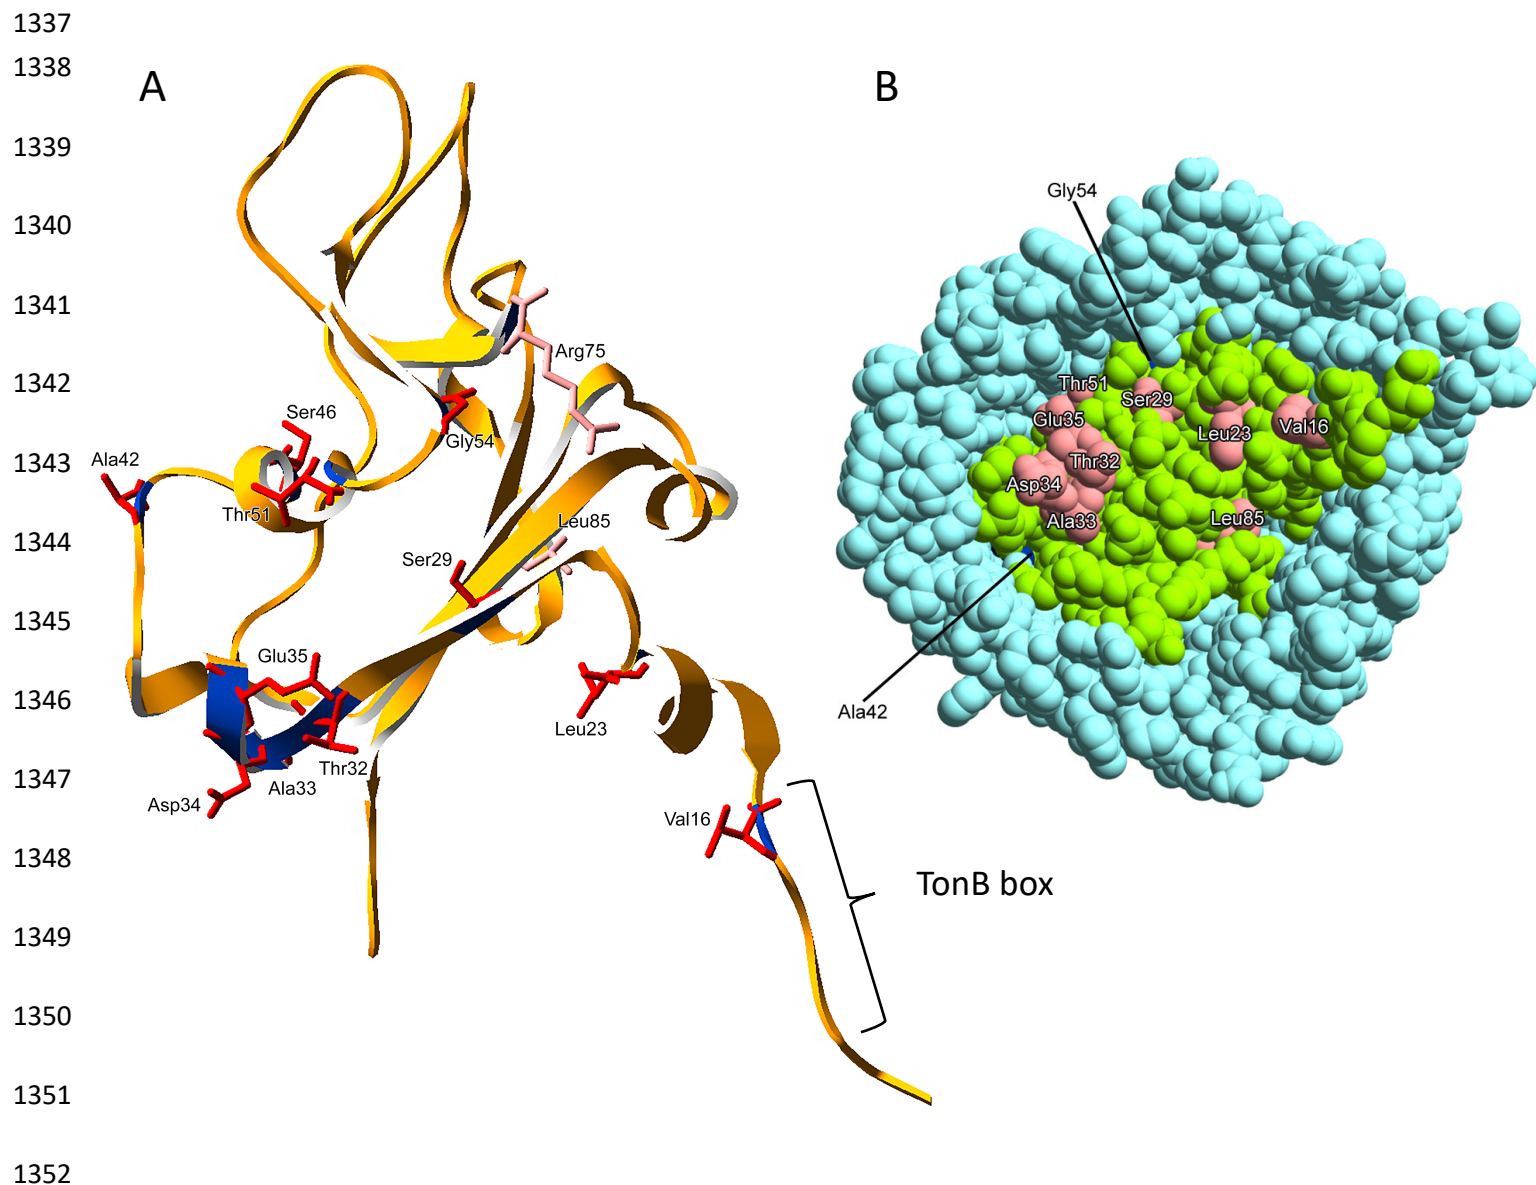

1353 **Figure 9: The FepA cork, residues 1-85.** (A) Ribbon diagram of the FepA cork  
1354 showing residues 1-85 in the mechanically weak segment of the FepA cork that  
1355 were chosen for Cys substitution and *in vivo* disulfide crosslinking. The external  
1356 surface of the cork is at the top, the periplasmic surface is at the bottom. The TonB  
1357 box is indicated. Red residues formed crosslinks; pink residues did not. (B) Space  
1358 filling model of the periplasmic surface of FepA, showing periplasmic accessibility

1359 of the residues labelled in (A). The FepA barrel is light blue; the FepA cork is  
1360 light green; the periplasmically accessible residues tested are shown in pink. T51 is  
1361 partially accessible; Gly54 and Ala42 (dark blue) are barely visible; Ser46 is  
1362 completely buried. The crystal structure was solved by Buchanan et al. (60).

1363

1364

1365

1366

1367



1368

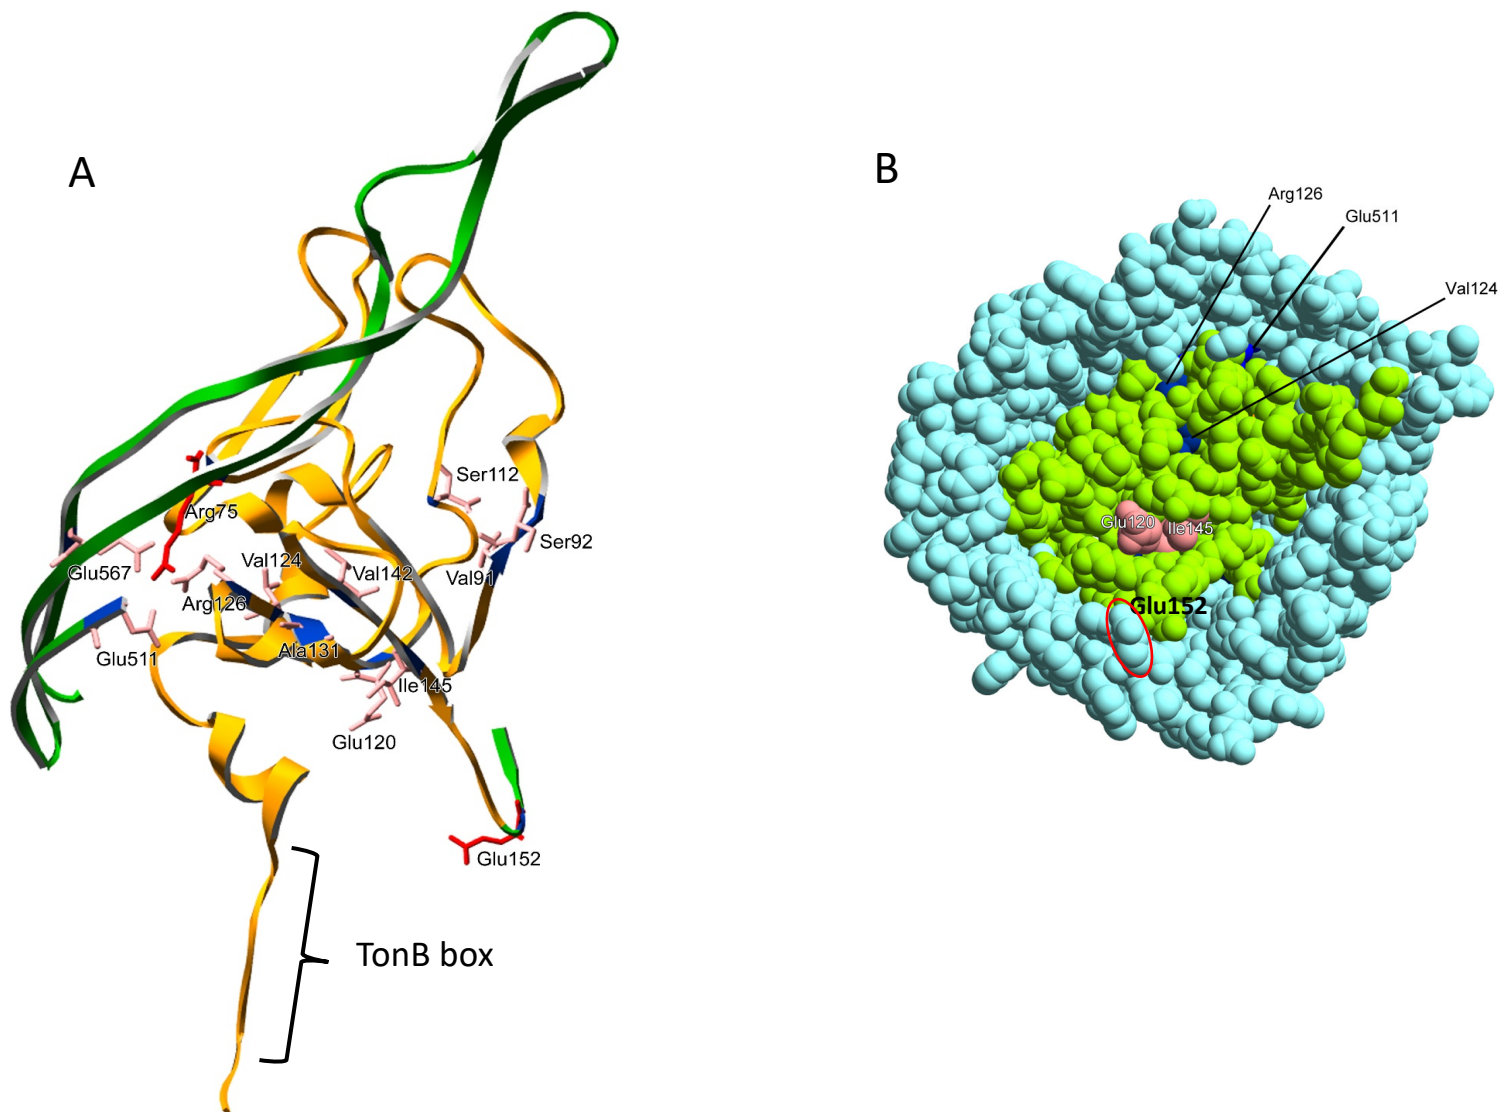

1382

1383 **Figure 10. The FepA cork, residues 75-152.** (A) Ribbon diagram of the FepA  
1384 cork showing residues 75-152, a mechanically recalcitrant segment of the cork,  
1385 that were chosen for Cys substitution and *in vivo* disulfide crosslinking. The  
1386 external surface of the cork is at the top, the periplasmic surface is at the bottom.  
1387 The TonB box is indicated. Red residues formed crosslinks; pink residues did not.

1388 Arg75 should be pink instead of red. Portions of the FepA barrel (dark green) show  
1389 residues Glu511 and Glu567 which together with cork residues Arg75 and Arg126  
1390 form the lock region (54). **(B)** Space filling model of the periplasmic surface of  
1391 FepA, showing periplasmic accessibility of the residues labelled in (A). The FepA  
1392 barrel is blue; the FepA cork is light green; periplasmically accessible residues are  
1393 shown in pink. Semi-accessible residues are dark blue. Glu 152 is circled in red.  
1394 The crystal structure was solved by Buchanan et al. (60).

1395

1396

1397

1398

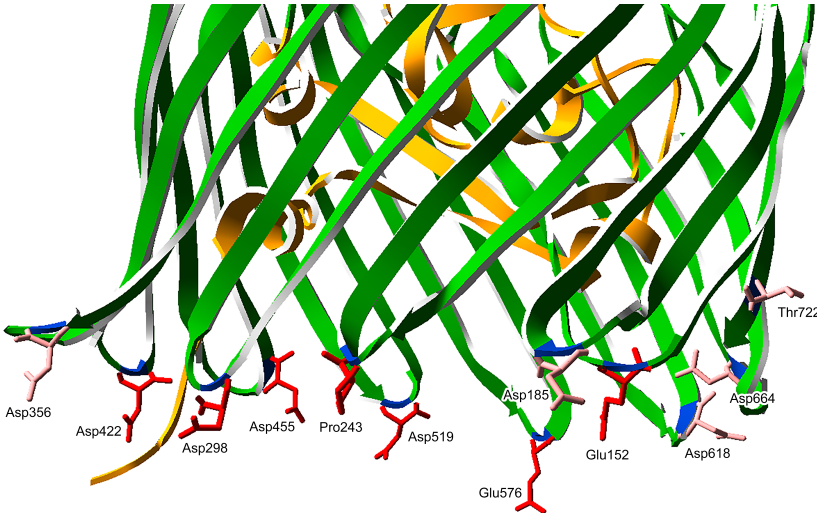

1399

1400

1401 **Figure 11. The FepA barrel  $\beta$ -strand turns.** Ribbon diagram of the FepA  $\beta$ -

1402 strand turns chosen for Cys substitution and *in vivo* disulfide crosslinking. Beta

1403 strands of the barrel are colored dark green. Red residues formed crosslinks; pink

1404 residues did not. The crystal structure was solved by Buchanan et al. (60).

1405

1406

1407

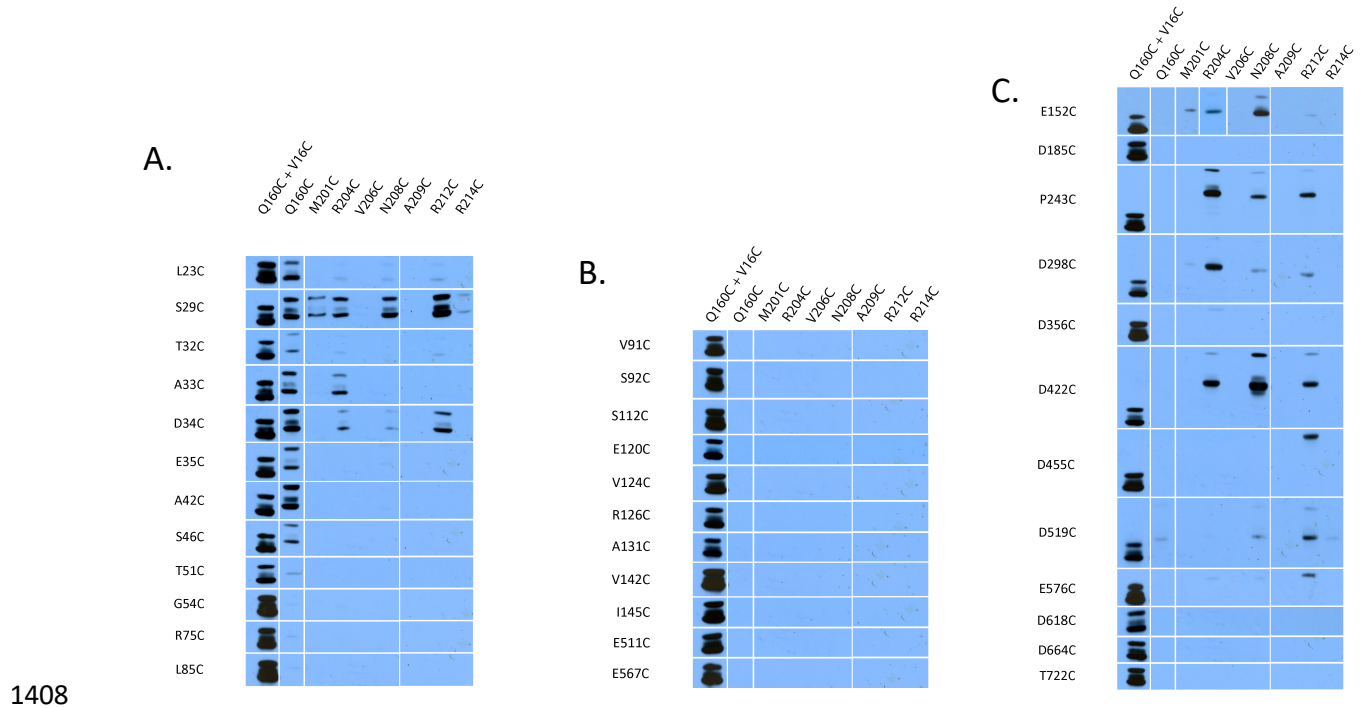

1408

1409

1410 **Fig. 12 The composite comparison of *in vivo* TonB-FepA disulfide**  
1411 **interactions identifies the interactive core of the TonB amphipathic helix as its**  
1412 **hydrophilic face. (A) TonB Cys substitutions paired with FepA Cys substitutions**  
1413 **from the mechanically weak region of the FepA cork (residues 1-70) as well as**  
1414 **R75C and L85C from the transition between mechanically weak and mechanically**  
1415 **recalcitrant domains. R75 is considered a part of the “lock region”. (B) TonB Cys**  
1416 **substitutions paired with FepA Cys substitutions from the mechanically recalcitrant**  
1417 **region of the FepA cork (residues 91-145) and the FepA “lock region” (residues**  
1418 **R126, E511C and E567C). (C) TonB Cys substitutions paired with FepA Cys**  
1419 **substitutions located in barrel  $\beta$ -strand turns as well as FepA E152C located at the**

1420 transition between the FepA cork and barrel. TonB Cys substitutions are indicated  
1421 across the top of the immunoblots. FepA Cys substitutions are indicated along the  
1422 left side of each composite. TonB-FepA disulfide-crosslinked complexes were  
1423 visualized in strain KP1491[W3110  $\Delta fepA$ ,  $\Delta(\text{tonB}, P14)::kan$ ]. Composite  
1424 immunoblots of non-reducing SDS polyacrylamide gels with anti-TonB  
1425 monoclonal antibody are shown. Since not all experiments were performed on the  
1426 same immunoblot, exposures for this composite summary were chosen based on  
1427 matching the Q160C + V16C standards among immunoblots (left-most lanes in A,  
1428 B, and C).

1429

1430

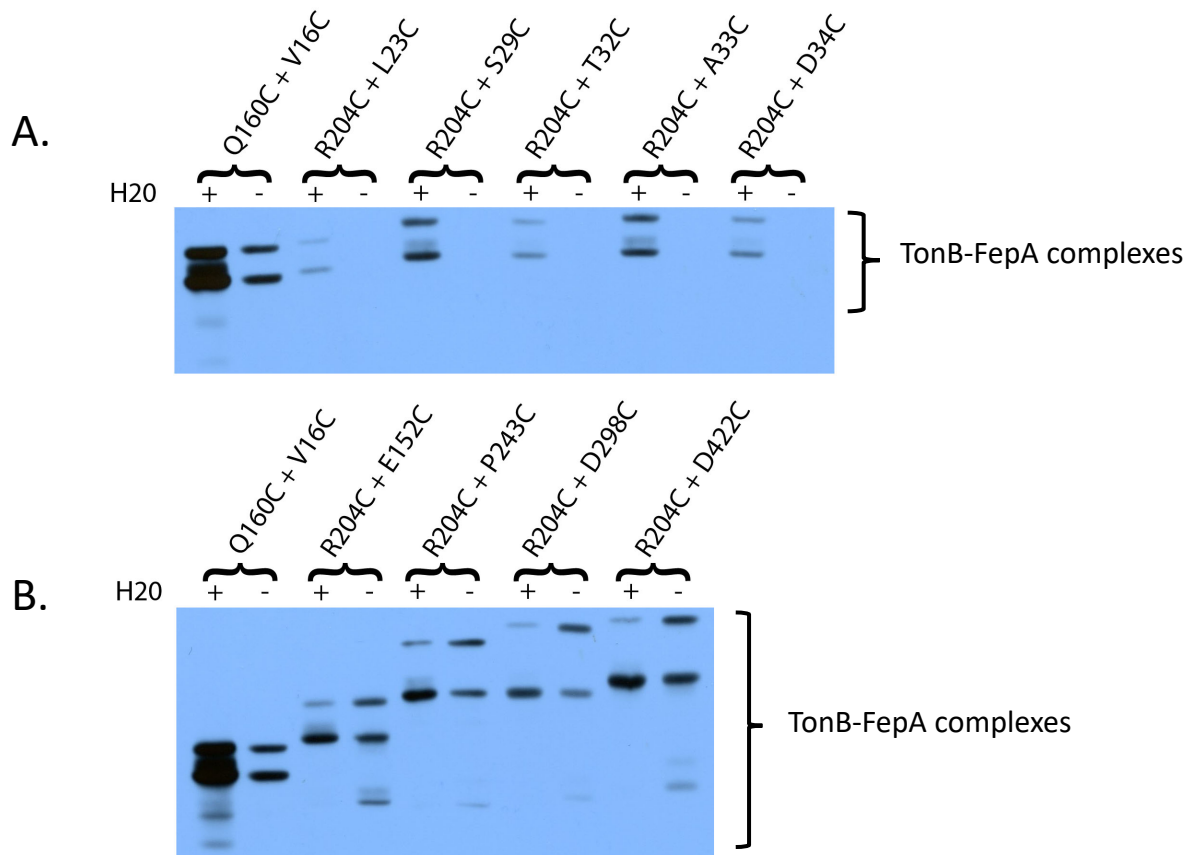

1431

1432

1433 **Figure 13: *In vivo*, TonB R204C makes both functionally important and**

1434 **functionally unimportant disulfide crosslinks with FepA Cys substitutions.**

1435 TonB Cys substitution + FepA Cys substitution combinations are indicated at the

1436 top of each set of lanes. H20 (+) indicates the presence of the wild-type H20 allele

1437 in the TonB transmembrane domain. (-) indicates the presence of the inactivating

1438 H20A mutation. **(A)** The presence of the TonB H20A mutation significantly

1439 reduced disulfide crosslinking by FepA early cork Cys substitutions (depicted in

1440 Fig. 9). **(B)**. The H20A mutation has little effect on the overall abundance of

1441 R204C-mediated disulfide crosslinks at the cork-barrel interface, specifically FepA  
1442 E152C (depicted in Fig. 10) or the barrel turns, where they occurred (depicted in  
1443 Fig. 11). The TonB Q160C-FepA V16C pair was used as a standard for  
1444 comparison of relative levels (far left lanes in A. and B.). TonB-FepA disulfide-  
1445 crosslinked complexes were visualized in strain KP1491[W3110  $\Delta fepA$ ,  
1446  $\Delta(\text{tonB}, P14)::kan$ ]. Immunoblots of non-reducing SDS polyacrylamide gels with  
1447 anti-TonB monoclonal antibody are shown. Monomer TonB levels for all samples  
1448 in these immunoblots were at or near chromosomal levels (data not shown).  
1449  
1450

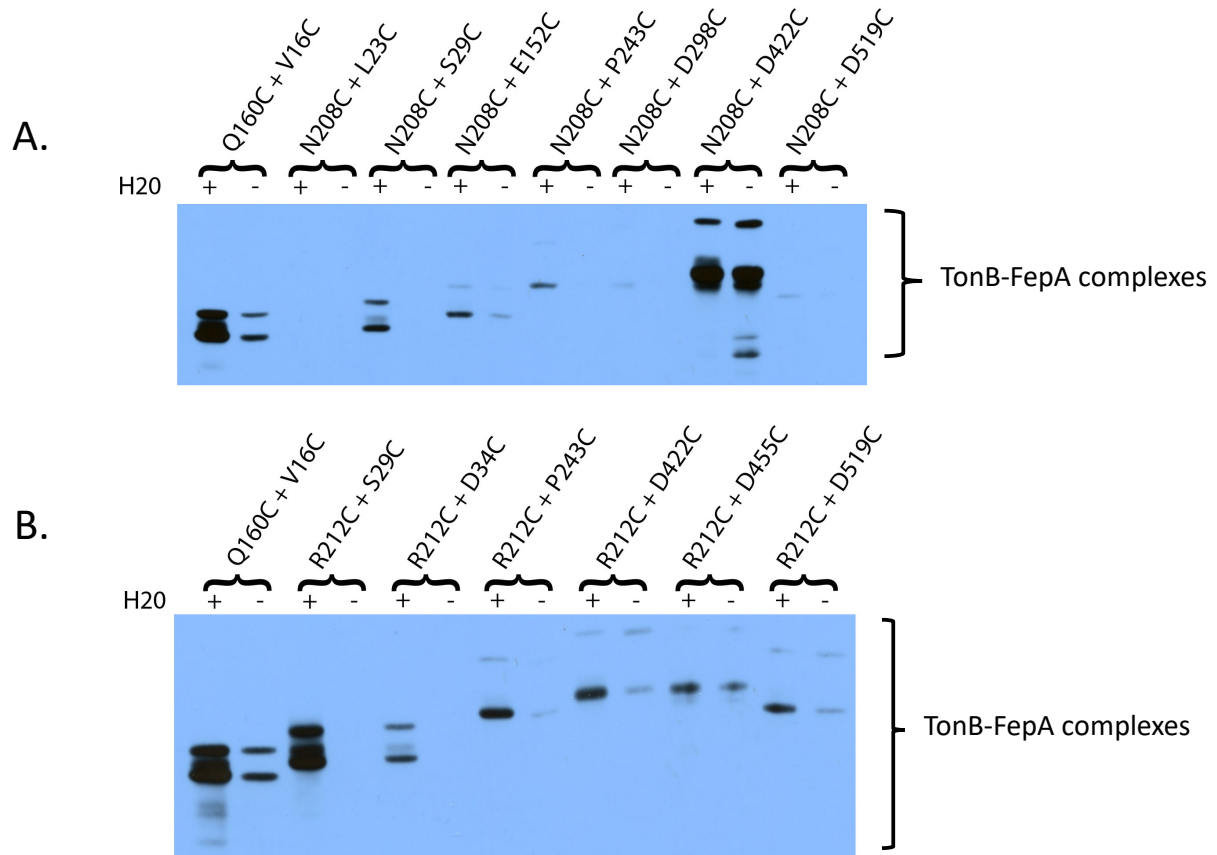

1451

1452

1453 **Figure 14: *In vivo*, TonB N208C and TonB R212C make both functionally**  
1454 **important and functionally unimportant disulfide crosslinks with FepA Cys**  
1455 **substitutions.** TonB Cys substitution + FepA Cys substitution combinations are  
1456 indicated at the top of each set of lanes. H20 (+) indicates the presence of the wild-  
1457 type H20 allele in the TonB transmembrane domain. (-) indicates the presence of  
1458 the inactivating H20A mutation. **(A)** The presence of the TonB H20A mutation  
1459 generally reduced disulfide crosslinking by TonB N208C. The notable exception  
1460 was the very abundant crosslink with D422C, located in a FepA barrel turn



1461 (depicted in Fig. 11). This interaction was impervious to the presence of the H20A  
1462 mutation. **(B)** Most notably, TonB R212C makes a very abundant, H20-specific,  
1463 crosslink with FepA S29C (depicted in Fig. 9). It also makes H20-specific  
1464 complexes with some of the FepA Cys substitutions in the barrel turns (depicted in  
1465 Fig. 11). The TonB Q160C-FepA V16C pair was used as a standard (far left lanes  
1466 in A. and B.). TonB-FepA disulfide-crosslinked complexes were visualized in  
1467 strain KP1491[W3110  $\Delta fepA$ ,  $\Delta(\text{tonB}, P14)::kan$ ]. Immunoblots of non-reducing  
1468 SDS polyacrylamide gels with anti-TonB monoclonal antibody are shown.  
1469 Monomer TonB levels for all samples in these immunoblots were at or near  
1470 chromosomal levels (data not shown).

1471

1472

1473

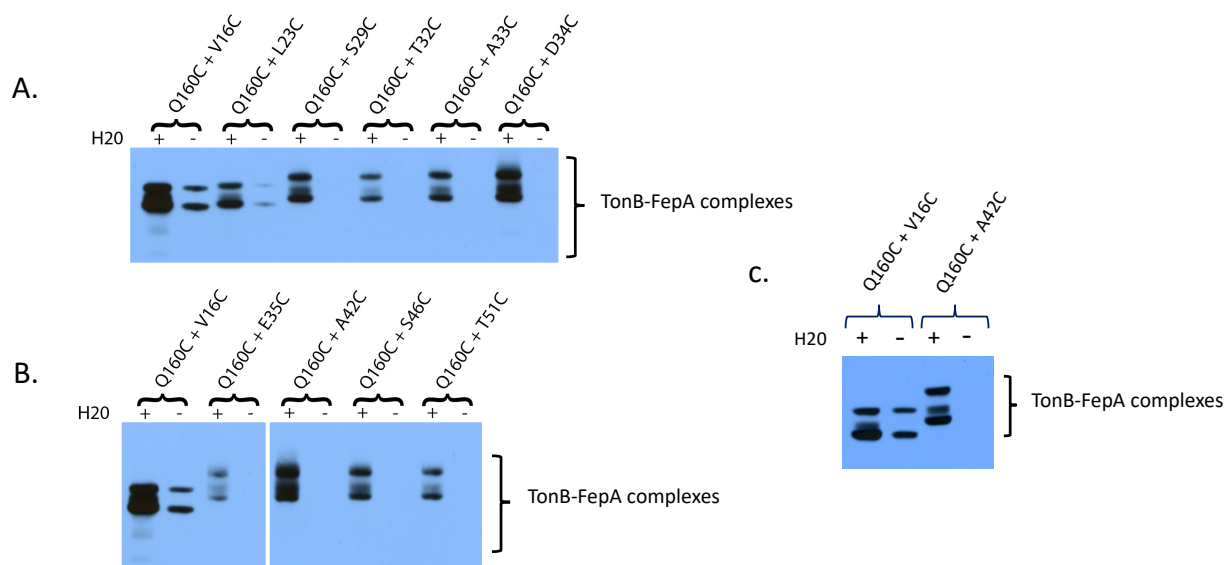

1474

1475

1476 **Figure 15: *In vivo*, TonB Q160C makes several functionally important**

1477 **disulfide crosslinks within the mechanically weak segment of the FepA cork,**

1478 **including with buried residues (depicted in Fig. 9). TonB Cys substitution +**

1479 **FepA Cys substitution combinations are indicated at the top of each lane. H20 (+)**

1480 **indicates the presence of the wild-type H20 allele in the TonB transmembrane**

1481 **domain. (-) indicates the presence of the inactivating H20A mutation. (A) TonB**

1482 **Q160C made complexes with several FepA substitutions, all of which were**

1483 **prevented by the TonB H20A mutation. Notably the complex with FepA D34 was**

1484 **of nearly equal abundance to the standard TonB Q160C-FepA V16C pair; unlike**

1485 **that standard, it was entirely prevented by the presence of the TonB H20A**

1486 **mutation. (B) TonB Q160C makes a complex with buried residue FepA A42C of**

1487 **nearly equal abundance to the standard TonB Q160C-FepA V16C pair; it was**

1488 entirely prevented by the presence of the TonB H20A mutation. For this composite  
1489 immunoblot, the exposure on the right was chosen based on matching it to the  
1490 same intensity as the Q160 + V16C standard shown in the left panel. (C) Direct  
1491 comparison of Q160C complexes with FepA V16C and FepA A42C on the same  
1492 immunoblot and with a shorter exposure. TonB-FepA disulfide-crosslinked  
1493 complexes were visualized in strain KP1491[W3110  $\Delta fepA$ ,  $\Delta(\text{tonB}, P14)::kan$ ].  
1494 Immunoblots of non-reducing SDS polyacrylamide gels with anti-TonB  
1495 monoclonal antibody are shown. Monomer TonB levels for all samples in these  
1496 immunoblots were at or near chromosomal levels (data not shown).

1497

1498

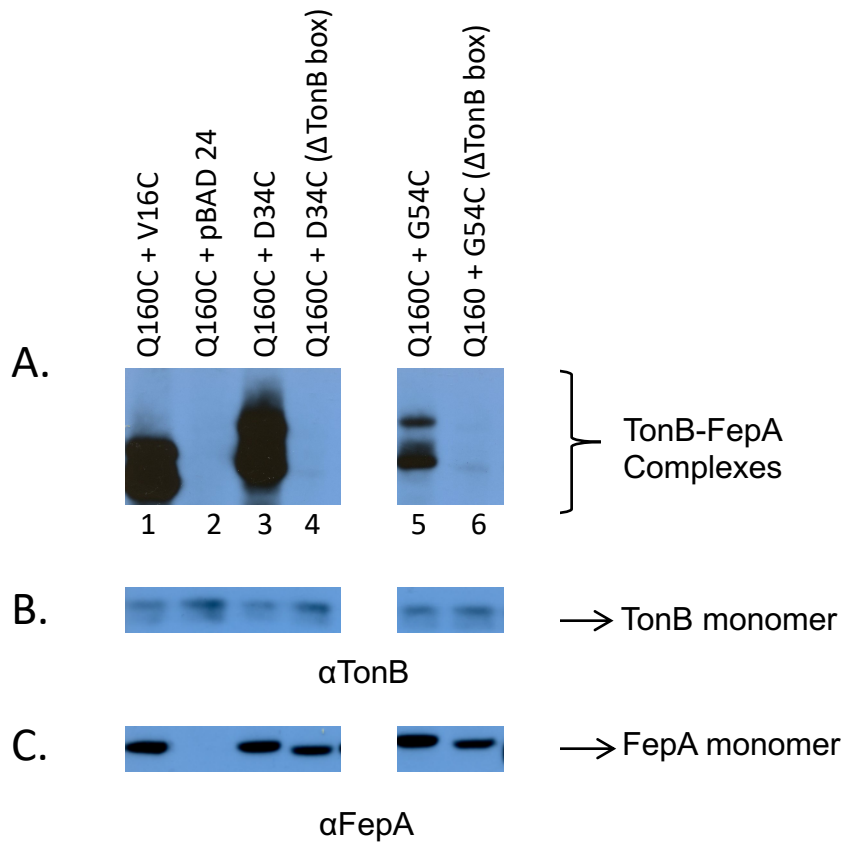

1499

1500

1501 **Figure 16. Deletion of the FepA TonB box prevents *in vivo* disulfide complex**

1502 **formation by TonB Q160C. (A) TonB-FepA disulfide-crosslinked complexes**

1503 visualized in strain KP1491[W3110  $\Delta$ fepA,  $\Delta$ (tonB,P14)::kan] by immunoblots of

1504 non-reducing SDS polyacrylamide gels with anti-TonB monoclonal antibody.

1505 pBAD24 is the vector into which *fepA* variants were cloned. **(B) Monomer levels**

1506 of TonB from the same samples as A), visualized by anti-TonB monoclonal

1507 antibody. **(C) Monomer levels of FepA from same samples as A.), visualized by**

1508 anti-FepA polyclonal antibody. All lanes are from the same immunoblot with a

1509 center lane masked.

1510

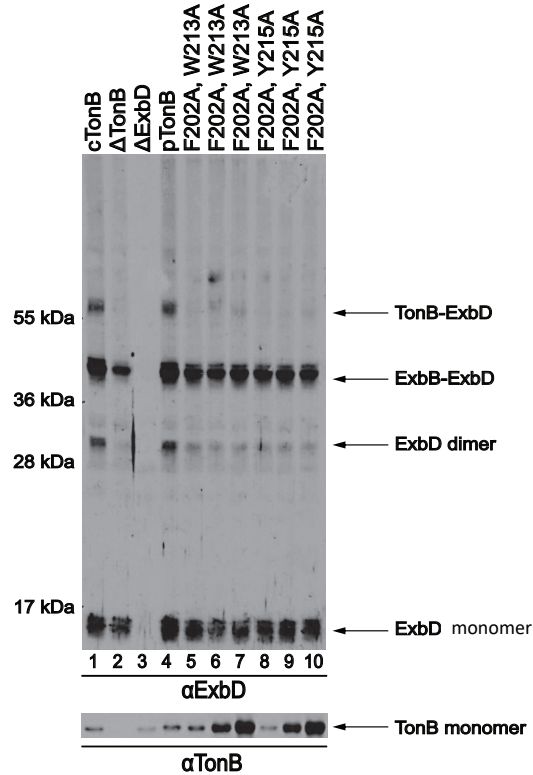

1511

1512

1513 **Figure 17. TonB F202A, W213A does not form the TonB-ExbD heterodimer.**

1514 **Upper:** Immunoblot with anti-ExbD antibodies of formaldehyde crosslinked

1515 samples. Lane 1, W3110 expressing chromosomally encoded TonB (cTonB);

1516 Lane 2, KP1344 [W3110 Δ(*tonB*, *P14*)::*blaM*]; Lane 3 RA1021 (W3110 Δ*exbD*);

1517 Lane 4, plasmid-encoded TonB (pKP442) with 0.001% arabinose; Lane 5, pKP531

1518 (pKP442 TonB with F202A, W213A double mutations) with 0.002% arabinose;

1519 Lane 6, pKP531 with 0.005% arabinose; Lane 7, pKP531 with 0.01% arabinose;

1520 Lane 8, pKP532 (pKP442 TonB with F202A, W215A double mutations) with

1521 0.002% arabinose; Lane 9, pKP532 with 0.005% arabinose; Lane 10, pKP532 with

1522 0.01% arabinose. **Lower:** Corresponding steady state levels of TonB from the

1523 samples above are shown. For pKP531 and pKP532, note the increase in TonB

1524 expression with increasing addition of the inducer, arabinose.

1525

1526

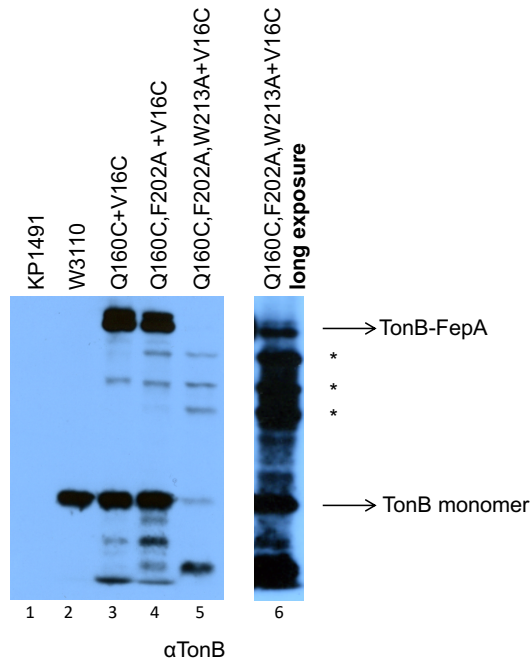

1527

1528

1529 **Figure 18. Inactivation of the TonB carboxy terminus appears to divert TonB**

1530 **Q160C down a path to triplet homodimer formation.** Lane 1, KP1491 [W3110

1531  $\Delta fepA, \Delta(\text{tonB}, P14)::kan$ ]: the parent strain used in all these studies. Lane 2,

1532 W3110: the wild-type strain showing the steady state level of chromosomally

1533 encoded TonB. Lane 3, TonB Q160C in combination with FepA V16C. Lane 4,

1534 TonB Q160C with the additional F202A substitution in combination with FepA

1535 V16C. Lane 5, TonB Q160C in combination with additional F202A and W213A

1536 substitutions in combination with FepA V16C. Lane 6, long exposure of lane 5 to

1537 reveal relative levels of TonB-FepA and triplet homodimer complexes. Positions of

1538 TonB monomer and TonB-FepA complexes are indicated on the right. Potential

1539 triplet homodimers are indicated by asterisks (\*). Immunoblots of non-reducing



1540 SDS polyacrylamide gels developed with monoclonal anti-TonB antibody are

1541 shown.

1542

1543

1544

1545

1546

1547
